# Reproductive skew, fitness costs, and winner-loser effects in social-dominance evolution

Olof Leimar<sup>1, \*</sup> and Redouan Bshary<sup>2</sup>

<sup>1</sup>Department of Zoology, Stockholm University, SE-106 91 Stockholm, Sweden

<sup>2</sup>Institute of Biology, University of Neuchâtel, Neuchâtel, Switzerland

\*Corresponding author; e-mail: [olof.leimar@zoologi.su.se](mailto:olof.leimar@zoologi.su.se)

## Abstract

Social hierarchies can increase reproductive skew in group-living animals. Using game theory we investigate how the opportunity for differently ranked individuals to acquire resources influences reproductive skew, costs of hierarchy formation, and winner and loser effects. Individuals adjust their aggressive and submissive behaviour through reinforcement learning. The learning is based on perceived rewards and penalties, which depend on relative fighting ability. From individual-based simulations we determine evolutionary equilibria of traits that control an individual's learning. We examine situations that differ in the extent of monopolisation of contested resources by dominants and in the amounts of uncontested resources that are distributed independently of rank. With costly fighting, we find that stable dominance hierarchies form, such that reproductive skew mirrors the distribution of resources over ranks. Individuals pay substantial costs of interacting, in particular in high-skew situations, with the highest costs paid by intermediately ranked individuals. For cases where dominants monopolise contested resources there are notable winner and loser effects, with winner effects for high ranks and very pronounced loser effects for lower ranks. The effects are instead weak when acquired resources increase linearly with rank. We compare our results on contest costs and winner-loser effects with field and experimental observations.

*Keywords:* Social hierarchy, territoriality, aggression, distribution of reproductive success, actor-critic learning, evolutionary game theory.

# 1 Introduction

2 Social hierarchies often influence the distribution of reproductive success in group-  
 3 living animals, with a skew towards higher success for dominant individuals (Ellis 1995;  
 4 Clutton-Brock 1998; Clutton-Brock and Huchard 2013). The mating systems where  
 5 dominance interactions can allocate reproductive success might extend beyond those of  
 6 a group of individuals equally utilising an area, to also include systems with a spatial  
 7 structure, such as leks and some forms of territoriality. To gain a broader perspective  
 8 on empirical studies of such systems, and to inspire further investigation, it is of interest  
 9 to derive theoretical predictions about the relation between an individual's dominance  
 10 rank and its reproductive success, as well as about the fitness costs of acquiring and  
 11 maintaining a certain rank. Up to now there are, however, few theoretical models  
 12 dealing with the distribution of reproductive success in social hierarchies, or with the  
 13 costs of dominance interactions. Here we use an evolutionary game-theory model of  
 14 hierarchy formation to examine reproductive skew, fitness costs, and winner and loser  
 15 effects in social dominance.

16 Our model uses learning about differences in fighting ability as a behavioural mech-  
 17 anism that can give rise to within-sex dominance hierarchies, through pairwise interac-  
 18 tions with aggressive and submissive behaviours. Learning in the model is actor-critic  
 19 learning, which is a form of reinforcement learning (Sutton and Barto 2018). Individ-  
 20 uals have genetically determined traits that function as parameters for the learning  
 21 mechanism and can evolve to adapt learning to different situations. This approach  
 22 has been used to study social dominance (McNamara and Leimar 2020; Leimar 2021)  
 23 and here we extend it to allow for different degrees of monopolisation of reproduc-  
 24 tion by high-ranking individuals. We examine life histories with an annual life cycle.  
 25 Over a season there are several reproductive cycles, each providing an opportunity for  
 26 dominant individuals to monopolise reproduction. The situations we study range from  
 27 an extreme case where all reproduction goes to a top-ranked individual in a group,  
 28 over varying reproductive opportunities for lower-ranked individuals, to those where  
 29 most reproduction is independent of rank and only a smaller part is achieved through  
 30 winning pairwise contests. Our analysis could also apply to situations with nearby ter-  
 31 ritories, or display sites on a lek, that differ in how valuable they are for reproduction  
 32 and that are allocated according to a dominance hierarchy. The model might represent  
 33 groups of males with mating opportunities as the resource that is contested, or females  
 34 with foraging opportunities or nesting sites as the resource. Individuals are unrelated  
 35 in the model, so it could apply to the dispersing sex in species where one sex disperses  
 36 and the other is philopatric, and to either sex if both sexes disperse.

A basic desideratum for the model is that dominance hierarchies form in such a way that reproductive skew is higher when dominants have greater opportunities to monopolise reproduction. To describe reproductive skew we use the recently developed multinomial index (Ross et al. 2020). We also examine the statistical relation between rank and reproductive success, which can be more informative than a skew index. We use a variant of so-called Elo rating to indicate an individual's rank. This measure was originally used for the ranking of chess players (Elo 1978) and is now often used to measure rank in social hierarchies (Albers and de Vries 2001; Neumann et al. 2011).

We express the cost of dominance interactions as mortality from fighting damage accumulated during the season, which means that individuals who die early in the season lose part of their reproductive opportunities. An equivalent effect would be a loss of vigour or condition from damage, eliminating reproductive success for the remainder of the season, or perhaps being weakened and driven away. We explore how fighting costs relate to reproductive skew and also how they depend on rank. For instance, costs could be higher for low-, medium-, or for high-ranked individuals. Based on what is known from previous game-theory models of social dominance, as well as from the long-standing study of single, pairwise contests, one would predict that the life-history costs of fighting should be higher when a greater proportion of lifetime reproductive success depends on winning dominance interactions. It is less clear how costs should depend on rank; there is no previous evolutionary analysis of this question. Studies on stress physiology in relation to social rank have found that subordinates are more stressed in some and dominants in other species (Creel 2001; Goymann and Wingfield 2004; Creel et al. 2013).

We also study if learning over a mating season affects an individual's tendency to win or lose an interaction with a new, matched but naive opponent, and if this varies with the individual's rank at the end of the season. This is related to and gives a new perspective on winner and loser effects, which have been much investigated experimentally (Rutte et al. 2006).

In the following, we briefly describe our model, present a number of results from individual-based evolutionary simulations, and discuss the implications of our results for observations of reproductive skew in social hierarchies and for the costs of dominance interactions. We also discuss how our model could be changed to take into account such things as multi-year life histories and overlapping generations, as well as the possible effects of common interest between members of a group.

# The model

Our model here is an extension of a previous one (Leimar 2021), with a new implementation of how dominance interactions occur over the mating season and how fitness benefits (reproductive success) and costs (mortality) come about. In the previous model, interactions in a group consisted of a sequence of rounds, each with randomly selected opponents, and fitness effects were represented as increments to payoffs (benefits and costs) that were translated into reproduction at the end of interactions. In the current model, interactions are structured into multi-round contests that occur during one or several reproductive opportunities or cycles, which might better correspond to natural interactions. Fitness effects are given a concrete life-history representation, with benefits as acquired resources, such as mating opportunities, and costs as mortality from accumulated fighting damage. Figure 1 gives an overview of these aspects.

The season is divided into a number of reproductive cycles (Fig. 1a) in which group members participate. In a cycle, individuals meet in pairwise contests over dominance, with several contests per group member. The idea is that there should be good opportunities for group members to form a dominance hierarchy. For instance, a pair with similar fighting abilities can have several contests, potentially settling which of them dominates the other. A contest (Fig. 1b) can be thought of as an opportunity for dominance interaction; if dominance is already settled, there is no interaction. If there is an interaction, the model assumes a minimum and maximum number of rounds, to ensure that group members have experience of interacting with each other. A contest ends if there is a specified number of successive rounds with either a clear direction, so that one individual is aggressive and the other submits, which then indicates dominance, or a specified number of rounds where both submit, which indicates a draw. This aspect of the model is inspired by how dominance is often scored in experiments on hierarchy formation. The sequence of contests can produce a linear hierarchy, but it is also possible that there are cycles, or that some dominance relations remain undetermined, for instance if some group members avoid being aggressive towards each other, or if some continue fighting.

Following the contests, the resources (e.g., mating opportunities) are distributed according to rank (Fig. 1c). If some, or even all, ranks are undetermined at this stage, those ranks are randomly assigned (so if all individuals keep fighting, refusing to submit, resources are randomly acquired, both within and between cycles). We investigate four distributions of acquired resources over the ranks (Fig. 1c). They differ in how strongly the top ranks in a hierarchy monopolise resources, and are defined so that the mean acquired resource per individual is 1. The model also allows for uncontested re-

sources, which are distributed to all (surviving) group members, irrespective of contest outcomes. The amount of reproductive skew that would result from these assumptions about acquired resources, for a hypothetical case where there is a single reproductive cycle with a linear dominance hierarchy, is shown in Fig. 1d.

The probability of survival from one reproductive cycle to the next depends on an individual's accumulated damage at that point in time. Each round of fighting adds to damage, in a way that depends of the relative fighting abilities of the interacting individuals. When a new reproductive cycle starts (Fig. 1a), individuals are assumed to retain their previous learning, but the contests over dominance start as if from scratch. In many cases this results in the re-forming of a previous hierarchy with little or no fighting, but in some cases (e.g., when individuals have died) there can be contests with additional fighting. Finally, the reproductive success of each group member is allocated in proportion to its accumulated resources, for instance its mating success, over the entire season, irrespective of whether the individual survived the entire season.

For the Elo rating we let each individual  $i$  start with a rating of zero,  $E_i = 0$ , and update ratings after an interaction resulting in dominance by  $i$  over  $j$  (Fig. 1b) by increasing  $E_i$  and decreasing  $E_j$  by  $2.5(1 - P_{ij})$ , with  $P_{ij} = 1/(1 + \exp(-E_i + E_j))$ . The ratings are also updated after a contest ending in a draw. This is a version of the approach previously used to measure rank (Albers and de Vries 2001; Neumann et al. 2011).

Important concepts and notation for the model are summarised in Table 1. A detailed model description, including those aspects that are the same as in the previous model (Leimar 2021), are presented in Supplementary Information Online.

## Evolutionary simulations

As mentioned, individuals are assumed to have genetically determined traits. The evolution of the traits is studied in individual-based simulations. The traits for individual  $i$  are (Table 1): degree of generalisation,  $f_i$ ; preference and value learning rates,  $\alpha_{\theta i}$ ,  $\alpha_{wi}$ ; initial preference for action A,  $\theta_{0i}$ ; initial estimated value,  $w_{0i}$ ; effect of observations on preference and value functions,  $\gamma_{0i}$ ,  $g_{0i}$ ; and perceived reward from performing A,  $v_i$ .

In evolutionary simulations, each trait is determined by an unlinked diploid locus with additive alleles. Alleles mutate with a probability of 0.002 per generation, with normally distributed mutational increments. The standard deviation of mutational increments for each trait was adjusted to correspond to the range of values of the trait, to ensure that simulations could locate evolutionary equilibria.

A simulated population consisted of 500 groups of 8 individuals taking part in

dominance interactions (either males or females), plus 8 individuals of the other sex, resulting in a total population size of  $N = 8000$ , which is the same as for simulations of the previous model (Leimar 2021). Each interacting individual was assigned a quality  $q_i$ , independently drawn from a normal distribution with mean zero and standard deviation  $\sigma_q$ .

Offspring for the next generation were formed by randomly selecting parents in a group for each of 16 offspring from that group, with probabilities proportional to an individual's accumulated resources for the sex involved in interactions and uniformly for the other sex. The offspring were randomly dispersed over the groups in the next season, to eliminate any effects of relatedness in local groups. For each case reported in Table 2, simulations were performed over 5000 generations, repeated in sequence at least 100 times, to estimate mean and standard deviation of traits at an evolutionary equilibrium.

## Standard parameter values

The following ‘standard values’ of parameters (Table 1) were used: mortality cost from damage,  $c_1 = 0.002$ ; distribution of individual quality,  $\sigma_q = 0.50$ ; observations of relative quality,  $a_1 = b_1 = 0.707$ ,  $\sigma = 0.50$ ; perceived penalty variation,  $\sigma_p = 0.25$ . For these parameter values, around 50% of the variation in the observations  $\xi_{ijt}$  by individuals in each round is due to variation in relative fighting ability,  $q_i - q_j$ .

## Results

Using four distributions of resources over dominance ranks ( $V_1(k)$ , Fig. 1c) in combination with four values of uncontested resources ( $V_0 = 0, 1, 4, 9$ ), we analysed 16 cases of individual-based evolutionary simulations, summarised in Table 2. The course of interactions over the season is illustrated in Fig. 2, for the cases with  $V_0 = 0$ . Time in the season is defined such that the reproductive cycles start at  $t = 0.00, 0.25, 0.50, 0.75$ . As can be seen, most of the divergence in Elo ratings occurs early in the first cycle (Fig. 2a), and this is also when most damage is incurred (Fig. 2b). The explanation is that there are more and longer fights early in the season. It should be noted that there is considerable variation between groups, depending on such things as the particular fighting abilities  $q_i$  in a group, the timing of mortality, and randomness in contest outcomes (Fig. S1 gives examples).

In presenting results, we show statistical model fits (non-linear regressions, including loess regressions), to ease comparison. Because there is considerable random variation



in reproductive and damage outcomes between groups and individuals, we also show individual data points together with fitted curves in Supplementary Information Online.

Figure 3 gives an overview of the distribution of reproductive success and the cost of fighting for different cases (Figs. S2 and S3 show data points for panels (a) and (c)). The distributions of reproductive success for the different cases (Fig. 3a) have similar shapes as the underlying distributions of resources over dominance ranks (Fig. 1c). The reason is that dominance hierarchies remain fairly stable over the season, at least with regard to the rankings that matter for reproductive success. This also holds for the skew indices (Fig. 3b vs. 1d). The accumulated damage is highest for individuals of intermediate rank (Fig. 3c), and this is most pronounced for the case with the greatest opportunities for dominants to monopolise reproduction ( $V_{14}$ ). The mortality costs from damage are overall substantial (Fig. 3d), and are higher when a greater proportion of life-time reproduction can be acquired through social dominance.

To examine winner and loser effects for different cases, we simulated experiments where group members who survived over the season met new, matched opponents in staged contests. The probability of winning (becoming dominant) and the damage for a group member in such contests can be influenced by learning from previous interactions, involving the effects of generalising from previous winning and losing. We investigated how these effects varied with the final Elo rating of a group member. As can be seen in Fig. 4a, winner and loser effects are strongest for the  $V_{14}$  case, followed by  $V_{12}$  and, with weaker effects,  $V_{13}$  and  $V_{11}$ . Variation in accumulated damage shows a similar pattern (Fig. 4b). The explanation in terms of learning appears in Fig. 4c. Because of individual recognition, only the generalised components of the action preference and the estimated value influence interactions with new opponents. The generalised component of the preference for action A is  $h_{iit} = f_i \theta_{iit}$ , where  $f_i$  is the genetically determined degree of generalisation and  $\theta_{iit}$  is a learned weight (Table 1). This component will vary strongly with Elo rating if  $f_i$  is large and  $\theta_{iit}$  shows notable variation, from negative to positive, with Elo rating. Effects of learning on  $\theta_{iit}$  will be larger when  $f_i$  is larger, so the value of  $f_i$  is driving the difference between the cases in Fig. 4c, and thus explains the results in panels (a) and (b) of the figure. The mean values of  $f_i$  appear in Table 2 (cases 1, 5, 9, 13) and are in accordance with this explanation. Panels (a) and (c) of Fig. 4 also show that loser effects are stronger than winner effects, in the sense that the intersections with the horizontals  $\Pr(\text{win}) = 0.5$  and  $h_{iit} = 0$ , respectively, occur for positive Elo ratings. Thus, on average group members tend to lose against matched opponents. The relation between fighting ability and Elo rating (Fig. 4d) shows that the final ratings are distributed approximately symmetrically around zero.

The fitted curves in Figs. 3 and 4 are for cases with  $V_0 = 0$ . With more of life-time reproduction coming from uncontested resources, the dependence of reproductive success on Elo rating is more shallow (Fig. 5a,b) and there is less fighting damage (Fig. 5c,d). In contrast, the degree of generalisation becomes higher for greater  $V_0$  (Table 2), resulting in stronger winner and loser effects (Fig. S6 and S7). Increasing  $V_0$  also resulted in lower values for the initial aggressiveness ( $\theta_{0i}$  in Table 2).

## Discussion

We found that the pattern of resource availability over the ranks of a hierarchy strongly influenced the evolution of learning mechanisms and, as a consequence, the costs of acquiring dominance. Because hierarchies remained relatively stable over the season, the distribution of reproductive success over ranks mirrored that of the resources (Fig. 3a vs. 1c). When dominants had greater opportunities to monopolise the resources needed for reproduction, there was greater skew (Fig. 3a, b). With greater skew, contests over dominance became more costly, in particular for individuals that had intermediate fighting abilities and were not among the top ranked (Fig. 3c, 5c, 5d). Such individuals have something to fight for, but face stiff competition. Winner and loser effects also depended on the pattern of resource availability and took the form of loser effects for lower-ranked individuals and winner effects for the top ranks (Fig. 4, S6, S7).

To appreciate these results, it is helpful to consider the reproductive success of all ranks of a hierarchy. A characteristic feature of social dominance is that subordinates show submissive behaviour and in this way relinquish claims on resources. For this to be favoured by evolution, submissive behaviour should have some benefit. In our model, benefits for subordinates come from uncontested resources ( $V_0$ ), contested resources ( $V_1(k)$ ) acquired by low-ranking individuals (if there are any), and from situations where high-ranking individuals die, causing ranks to improve for survivors. Even in a seemingly extreme situation, such as  $V_{14}$  in Fig. 3 (case 13 in Table 2, with  $V_0 = 0$ ), the group members with low Elo ratings should have some reproductive prospects, even if these are small. Because of mortality during the season, there is a small probability that all or nearly all higher-ranked competitors eliminate each other, leaving a surviving and previously low-ranked individual with reproductive benefits (e.g., in Fig. S2d there are a few data points with positive reproductive success for individuals with low Elo rating). Some chance of reproductive success, even if it is small, can thus select against ‘desperado’ strategies, which otherwise would prevent dominance hierarchies



from forming, and might instead promote the evolution of fatal fighting (Enquist and Leimar 1990). For cases with uncontested resources ( $V_0 > 0$ ), subordinates have greater prospects, which means that submission for low-ranked individuals can be beneficial with little or no mortality for higher ranks.

We have also investigated the consequences of eliminating the risk of death from our model, with the expectation that strategies of refusing to submit should be favoured. From simulations (not shown) we found that without mortality costs ( $c_1 = 0$ ), dominance hierarchies do not form because individuals keep fighting and reproductive success becomes uncorrelated with fighting ability.

Monopolisation of resources by dominants implies a non-linear relation between rank and reproduction (Fig. 1c). Given that all ranks have some expected reproductive success, the influence of this non-linearity on winner and loser effects can be understood. In our model, winner and loser effects derive from generalisation (see explanation of results in Fig. 4). For instance, for the  $V_{14}$  cases generalisation is high (Table 2), which makes sense because the lowest-ranked individuals have little to gain from persisting in aggression in order to move up one rank or two, making loser effects adaptive for them. Contrast this with a linear case, where each increase in rank corresponds to the same increment in acquired resources, which holds for the distribution  $V_{11}$  in Fig. 1c, and also corresponds to the assumptions of the previous model (Leimar 2021). The evolutionary consequence of the linearity is limited generalisation (Table 2) with smaller winner and loser effects, as well as lower costs of fighting (Fig. 3d).

The perspective of social competence (Taborsky and Oliveira 2012; Bshary and Oliveira 2015; Fernald 2017; Varela et al. 2020) is relevant for these winner and loser effects. A key idea is that individuals adjust their fighting behaviour based on the consequences of winning or losing an interaction, using information obtained through learning. The strength of winner-loser effects should then depend on two factors: the relationship between rank and fitness and an individual's position within the hierarchy. If only top-ranking individuals acquire contested resources, losing once provides information that the top rank is out of reach, which should lead to reduced willingness to fight, in agreement with our results (Fig. 4).

It follows that there are two kinds of fitness non-linearity that are important for the results. First, with mortality as the cost of fighting, costs and benefits are non-additive, and it can be adaptive for low-ranked individuals to be submissive and avoid accumulating damage that would put their reproductive benefits at risk. Second, this effect becomes stronger when there is a non-linear relation between rank and resources.

## Reproductive skew models

Reproductive skew in social groups has been fairly much studied using evolutionary analysis (Johnstone 2000; Port and Kappeler 2010). Of these the ‘tug-of-war’ model (Reeve et al. 1998) shows some similarity to our model here, in that assumptions are made about costs of conflicts in a tug-of-war over reproduction. Even so, there are qualitative differences between our analysis and previous approaches. Our model makes assumptions about uncontested ( $V_0$ ) and contested ( $V_1(k)$ ) resources, and derives outcomes for reproductive skew and costs of contests from these assumptions, based on the evolution of behavioural mechanisms of hierarchy formation. Importantly, we also assume that the total reproductive output of a local group (e.g., 16 offspring in our simulations) is not influenced by mortality costs of accumulated damage; mortality only affects an individual’s share of the total. For the tug-of-war model, the aim is instead to derive predictions about reproductive skew from assumptions about how costs of conflicts reduce the total reproductive output of a group (which is a pair in the tug-of-war model (Reeve et al. 1998)). Because of these differences in basic assumptions, it is not meaningful to directly compare the results of the models.

Nevertheless, it is of interest to extend our model by incorporating common interest between group members, for instance letting the costs of conflicts reduce the total reproduction by a group. Our current assumption of a constant total reproductive output might be reasonable in some cases, such as for males competing over mating opportunities, but could be less realistic for females competing over resources. It is likely that common interest would lower the cost of hierarchy formation. In addition to common interest, allowing for multi-year life histories is a natural extension, raising the issue of the extent to which interactions from previous years should be remembered. This could throw light on questions of queuing for dominance, for which there are reproductive skew models (Kokko and Johnstone 1999).

Contested and uncontested resources are important ingredients in our model. They represent different assumptions about the distribution of resources in space and time. For instance, the distribution  $V_{14}$  of contested resources (Fig. 1) could represent competition between males over mating when one or more females become receptive, or the competition between females when there is a single suitable breeding territory. As mentioned, a distribution  $V_1(k)$  need not directly translate to reproductive skew; if individuals do not submit, acquired resources in a reproductive cycle become random, so with several reproductive cycles, there would be little or no reproductive skew. We might compare with experimental observations of the difficulties for high-ranking male junglefowl to control matings in a group (McDonald et al. 2017), reducing or even

eliminating skew. Thus, it is the shape of  $V_1(k)$  together with a stable hierarchy where subordinates yield to dominants that gives rise to reproductive skew in our model.

The distribution  $V_{11}$  (Fig. 1c) could represent a situation where resources appear in a dispersed manner, and if they are contested it is typically by two group members. Similarly,  $V_0$  could correspond to resources that individuals encounter singly, or possibly to resources acquired through alternative, non-aggressive strategies. Finally, if nearby territories are distributed according to rank, territory quality will influence the distribution of reproductive success.

## Comparison with observations

There are many simplifying assumptions in our model compared to natural situations. Among these are annual life histories, absence of common interest and relatedness between interacting individuals, no forgetting of previous interactions, and no within-season dispersal to other groups. Even with these simplifications, it is of interest to compare our results with observations, to gain further understanding of the evolution of social dominance.

## Rank and reproductive success

Obtaining data on both lifetime reproductive success and social dominance is challenging, but there are nevertheless many studies. While there is strong support for a general reproductive advantage of higher rank, genetic data also show that monopolisation of mating by dominant males in polygynous mammals is typically not complete (Pemberton et al. 1992; Hogg and Forbes 1997; Coltman et al. 1999; Worthington Wilmer et al. 1999; Coltman et al. 2002; Hoffman et al. 2003; Alberts et al. 2006; Twiss et al. 2006; Wroblewski et al. 2009; Pörschmann et al. 2010; Stopher et al. 2011). It thus seems that the most extreme case among our simulations (case 13 in Table 2, Fig. 1c, Fig. 3) is unrealistic in its assumptions about acquired resources. A certain amount of uncontested resources ( $V_0$ ) and/or the distributions  $V_{11}$ ,  $V_{12}$  or  $V_{13}$  might better correspond to natural situations. Combining uncontested resources with monopolisation of contested resources by dominants, we found that the relation between fighting ability and Elo rating was more diffuse for low than for high ranks (Fig. S6d and S7d). This would fit with observations where the precise positions of top-ranking individuals are clear while it is harder to rank individuals lower in the hierarchy.

## 348 **Costs of dominance interactions**

349 Our simulations yielded fairly high mortality costs of dominance interactions, also  
 350 with uncontested resources and limited reproductive skew (Fig. 3d). These results  
 351 raise the question of whether high costs of hierarchy formation occur in nature. As an  
 352 example, in female junglefowl, that are similar to the domestic fowl where dominance  
 353 hierarchies were first described (Schjelderup-Ebbe 1922), a strongly skewed distribution  
 354 of reproductive success was recorded in a relatively large free-ranging group (Collias  
 355 et al. 1994), but the costs of hierarchy formation for female junglefowl do not appear  
 356 to be high. A potential explanation for the seeming discrepancy is that breeding  
 357 junglefowl occur in rather small groups in nature (Johnson 1963; Collias and Collias  
 358 1967), perhaps with less competition over nest sites and other resources. The example  
 359 illustrates the difficulties of estimating costs of social dominance: these estimates need  
 360 to come from situations similar to those where the behavioural mechanisms evolved.

361 The important effect of mortality in our model is that individuals lose further  
 362 opportunities for reproduction. If individuals instead are driven out of the group and  
 363 fail to gain reproduction in another group, the evolutionary effect would be the same,  
 364 and this might be relevant for males in polygynous species. Variation in the duration  
 365 of tenure of a dominant male in a group is sometimes observed (Hoffman et al. 2003)  
 366 and could be an indication of costs. The general idea has support from a study of the  
 367 factors influencing tenure duration in polygynous mammals (Lukas and Clutton-Brock  
 368 2014).

369 Overall, although our results that costs of dominance interactions can be high has  
 370 potential for agreement with observations, perhaps even more when taking physiolog-  
 371 ical costs into account (Briffa and Sneddon 2007), the issue seems not to be resolved  
 372 using current data. One thing to note is that our model deals with situations where  
 373 social hierarchies distribute lifetime reproduction, whereas many observations of dom-  
 374 inance interactions come from situations where individuals compete for resources that  
 375 represent smaller fitness effects.

## 376 **Winner and loser effects**

377 We found a dramatic influence of the shape of the distribution of contested resources  
 378 on winner and loser effects (Fig. 4a, S6a, S7a), and this might ease comparison with  
 379 observations. Keeping in mind the limitations of our assumptions, our results for non-  
 380 linear distributions  $V_1(k)$  could correspond to the behaviour of younger individuals in  
 381 some species, who quickly learn to avoid contesting higher-ranked opponents, or to  
 382 individuals pursuing alternative, non-aggressive strategies. Our model would need to

383 be extended to further explore this issue.

384 There are several experiments on winner and loser effects (Rutte et al. 2006), but  
 385 they are often on species where the fitness effects of dominance in natural situations  
 386 are unknown. In addition, the natural breeding situation is frequently that of nearby  
 387 or partly overlapping territories or sites. To give a few examples, reproductive male  
 388 three-spined stickleback show stronger loser than winner effects (Bakker et al. 1989),  
 389 and natural aggressive interactions in this species likely occur between males in nearby  
 390 territories (Bakker and Sevenster 1983). Experiments with pumpkinseed sunfish have  
 391 found weak and short-lasting winner effects (Chase et al. 1994) and stronger and more  
 392 long-lasting loser effects (Beacham and Newman 1987; Beacham 1988). These exper-  
 393 iments used fish that were not breeding but taken from mixed-sex shoaling groups  
 394 of individuals in the field. The social structure of breeding pumpkinseed sunfish is  
 395 likely to be colonies of male nests that females visit and lay eggs in. Finally, there are  
 396 several studies on aggression and social dominance in the green swordtail, including  
 397 on bystander, winner, and loser effects (Earley and Dugatkin 2002), as well as field  
 398 studies on reproductive skew (Tatarenkov et al. 2008). The social system of the species  
 399 in nature is partially overlapping male home ranges, sometimes with the presence of  
 400 lower-ranking ‘satellite’ males, somewhat similar to leks (Franck and Ribowski 1993;  
 401 Franck et al. 1998). These studies illustrate that it could be challenging to link ex-  
 402 perimental work on social dominance to field situations, including to fitness effects of  
 403 rank. There is broad agreement between the studies and results from our current (Fig.  
 404 4) and previous (Leimar 2021) models in that loser effects are typically stronger than  
 405 winner effects, but the differences between experiments and field situations make it  
 406 harder to evaluate whether effects of non-linearity of the distribution of resources over  
 407 ranks, like those in Fig. 4, occur in nature.

## 408 **Consistent behaviour**

409 Traits related to aggression can be viewed as components of animal personalities (Sih  
 410 et al. 2004; Réale et al. 2007), which are characterised by consistency over time and  
 411 contexts. For situations with pronounced monopolisation of contested resources by  
 412 dominants, like the  $V_{12}$  and  $V_{14}$  distributions (Fig. 1c), our analysis predicts substantial  
 413 individual differences in aggressiveness, as a consequence of generalisation from learning  
 414 in a group (Fig. 4, S6, S7, Table 2). Distribution like  $V_{11}$  or  $V_{13}$  would instead result  
 415 in weaker such effects. The importance of social experience, compared to genetic or  
 416 developmental variation, is of interest to research on animal personalities, and our  
 417 results can provide some insight. Still, just as for winner and loser effects, there is the

difficulty of linking observations to fitness effects in the field, in particular to the shape of distributions of contested resources over ranks, limiting the conclusions that can be drawn.

In male junglefowl, winner and loser effects appear to have only a weak influence on dominance hierarchy formation, whereas genetic or developmental variation in aggressiveness is more important and shows consistency over time (Favati et al. 2017, 2021; Pizzari and McDonald 2019). These observations would agree with our results, provided that the distribution of acquired resources has roughly a linear shape. A linear shape is consistent with experimental data (McDonald et al. 2017), but it is not known how well these results correspond to field situations. Similar conclusions could apply to certain swordtail species (Wilson et al. 2011, 2013; Boulton et al. 2018). It would be of interest to investigate species with pronounced monopolisation of contested resources, in order to test whether they show strong effects of social experience on aggressiveness.

## Modelling social dominance and aggression

The game theory used here investigates the evolution of traits that control behavioural mechanisms, such as the parameters of actor-critic learning, over a range of situations. In terms of social cognition, the approach is in-between behaviourist assumptions of universal cognitive mechanisms and those of traditional game-theory modelling, entailing that individuals make optimal decisions in each particular situation. The overall aim of the approach is to integrate function and mechanism (McNamara and Houston 2009).

The issue of modelling styles can be formulated as a distinction between small-worlds models, in which individuals have accurate innate representations of their environment, including the decision-making machinery of others, and large-worlds models, where individuals instead rely on limited cognitive mechanisms that nevertheless have proven their worth over a range of imperfectly delineated circumstances (McNamara and Leimar 2020). There is also a correspondence to ideas about social competence (Taborsky and Oliveira 2012; Bshary and Oliveira 2015; Fernald 2017), focusing on how general developmental and cognitive mechanisms become adapted to social situations, thereby allowing individuals to respond effectively to their environment.

There is a long tradition of using learning in game theory, both in biology (Harley 1981) and economics (Fudenberg and Levine 1998). This can be combined with a study of the evolution of learning parameters or traits (Niv et al. 2002; Hamblin and Giraldeau 2009; Dridi and Lehmann 2014), as we have done here. To promote realism, it is preferable to study learning traits that have a correspondence in animal psychol-



ogy and neuroscience. For instance, aggressive behaviour is regarded as a potentially rewarding activity in animal psychology (Hogan and Roper 1978; Domjan et al. 2000; Fish et al. 2005). We implemented this perspective through a perceived reward  $v_i$  of performing aggression (Table 1). In traditional small-worlds game theory, rewards and payoffs are treated as the same and payoffs have the interpretation of fitness increments. In our model, as well as in similar learning models (McNamara and Leimar 2020; Leimar 2021; McNamara et al. 2021), perceived rewards and penalties of aggressive behaviour are instead interpreted as components of a mechanism that functions to guide an individual's life history in a favourable manner. Thus, the simulations in Table 2 with  $V_0 = 9$  have smaller evolved values of  $v_i$  than those with  $V_0 = 0, 1, 4$ , and also lower preference learning rates  $\alpha_{\theta_i}$  and initial aggression parameters  $\theta_{0i}$ , all of which tend to make individuals act in a cautious manner, reducing the risk of losing their substantial uncontested resources.

Our current model could be extended to include elements like bystander observations (Leimar 2021), multi-year life histories, dispersal, territoriality, or relatedness between group members. Among the ingredients needed for this to succeed are reasonable specifications of traits and perceptions of the interacting individuals. We believe such endeavours benefit from collaboration between modellers, experimentalists, and biologists with experience from the field, because this helps overcoming the considerable challenges of linking theoretical constructs to natural situations.

## Competing interests

The authors declare no competing interests.

## Funding

This work was supported by a grant (2018-03772) from the Swedish Research Council to OL.

## References

- Albers, P. C. H. and de Vries, H. 2001. Elo-rating as a tool in the sequential estimation of dominance strengths. *Animal Behaviour*, 61(2):489–495.
- Alberts, S. C., Buchan, J. C., and Altman, J. 2006. Sexual selection in wild baboons: from mating opportunities to paternity success. *Animal Behaviour*, 72(5):1177–1196.
- Bakker, T. C. M., Bruijn, E. F.-D., and Sevenster, P. 1989. Asymmetrical effects of prior winning and losing on dominance in sticklebacks (*Gasterosteus aculeatus*). *Ethology*, 82(3):224–229.
- Bakker, T. C. M. and Sevenster, P. 1983. Determinants of dominance in male sticklebacks (*Gasterosteus aculeatus* l.). *Behaviour*, 86(1-2):55–71.
- Beacham, J. L. 1988. The relative importance of body size and aggressive experience as determinants of dominance in pumpkinseed sunfish, *Lepomis gibbosus*. *Animal Behaviour*, 36(2):621–623.
- Beacham, J. L. and Newman, J. A. 1987. Social experience and the formation of dominance relationships in the pumpkinseed sunfish, *Lepomis gibbosus*. *Animal Behaviour*, 35(5):1560–1563.
- Boulton, K., Walling, C. A., Grimmer, A. J., Rosenthal, G. G., and Wilson, A. J. 2018. Phenotypic and genetic integration of personality and growth under competition in the sheepshead swordtail, *Xiphophorus birchmanni*. *Evolution*, 72(1):187–201.
- Briffa, M. and Sneddon, L. U. 2007. Physiological constraints on contest behaviour. *Functional Ecology*, 21(4):627–637.
- Bshary, R. and Oliveira, R. F. 2015. Cooperation in animals: toward a game theory within the framework of social competence. *Current Opinion in Behavioral Sciences*, 3:31–37.
- Chase, I. D., Bartolomeo, C., and Dugatkin, L. A. 1994. Aggressive interactions and inter-contest interval: how long do winners keep winning?. *Animal Behaviour*, 48(2):393–400.
- Clutton-Brock, T. H. 1998. Reproductive skew, concessions and limited control. *Trends in Ecology & Evolution*, 13(7):288–292.

- 507 Clutton-Brock, T. H. and Huchard, E. 2013. Social competition and selection in males  
508 and females. *Philosophical Transactions of the Royal Society B: Biological Sciences*,  
509 368(1631):20130074.
- 510 Collias, N., Collias, E., and Jennrich, R. I. 1994. Dominant red junglefowl (*Gallus*  
511 *gallus*) hens in an unconfined flock rear the most young over their lifetime. *The Auk*,  
512 111(4):863–872.
- 513 Collias, N. E. and Collias, E. C. 1967. A field study of the red jungle fowl in North-  
514 Central India. *The Condor*, 69(4):360–386.
- 515 Coltman, D. W., Bancroft, D. R., Robertson, A., Smith, J. A., Clutton-brock, T. H.,  
516 and Pemberton, J. M. 1999. Male reproductive success in a promiscuous mam-  
517 mal: behavioural estimates compared with genetic paternity. *Molecular Ecology*,  
518 8(7):1199–1209.
- 519 Coltman, D. W., Festa-Bianchet, M., Jorgenson, J. T., and Strobeck, C. 2002. Age-  
520 dependent sexual selection in bighorn rams. *Proceedings of the Royal Society B:*  
521 *Biological Sciences*, 269(1487):165–172.
- 522 Creel, S. 2001. Social dominance and stress hormones. *Trends in Ecology & Evolution*,  
523 16(9):491–497.
- 524 Creel, S., Dantzer, B., Goymann, W., and Rubenstein, D. R. 2013. The ecology of  
525 stress: effects of the social environment. *Functional Ecology*, 27(1):66–80.
- 526 Domjan, M., Cusato, B., and Villarreal, R. 2000. Pavlovian feed-forward mechanisms  
527 in the control of social behavior. *Behavioral and Brain Sciences*, 23(2):235–249.
- 528 Dridi, S. and Lehmann, L. 2014. On learning dynamics underlying the evolution of  
529 learning rules. *Theoretical Population Biology*, 91:20–36.
- 530 Earley, R. L. and Dugatkin, L. A. 2002. Eavesdropping on visual cues in green swordtail  
531 (*Xiphophorus helleri*) fights: A case for networking. *Proceedings of the Royal Society*  
532 *B*, 269(1494):943–952.
- 533 Ellis, L. 1995. Dominance and reproductive success among nonhuman animals: A  
534 cross-species comparison. *Ethology and Sociobiology*, 16(4):257–333.
- 535 Elo, A. 1978. *The rating of chessplayers, past and present*. Ishi Press International.
- 536 Enquist, M. and Leimar, O. 1990. The evolution of fatal fighting. *Animal Behaviour*,  
537 39(1):1–9.

- 538 Favati, A., Løvlie, H., and Leimar, O. 2017. Individual aggression, but not winner-loser  
539 effects, predicts social rank in male domestic fowl. *Behavioral Ecology*, 28(3):874–882.
- 540 Favati, A., Løvlie, H., and Leimar, O. 2021. Effects of social experience, aggressiveness  
541 and comb size on contest success in male domestic fowl. *Royal Society Open Science*,  
542 8(2):201213.
- 543 Fernald, R. D. 2017. Cognitive skills and the evolution of social systems. *Journal of*  
544 *Experimental Biology*, 220(1):103–113.
- 545 Fish, E. W., DeBold, J. F., and Miczek, K. A. 2005. Escalated aggression as a reward:  
546 corticosterone and GABAA receptor positive modulators in mice. *Psychopharma-*  
547 *cology*, 182(1):116–127.
- 548 Franck, D., Klamroth, B., Taebel-Hellwig, A., and Scharl, M. 1998. Home ranges and  
549 satellite tactics of male green swordtails (*Xiphophorus helleri*) in nature. *Behavioural*  
550 *Processes*, 43(2):115–123.
- 551 Franck, D. and Ribowski, A. 1993. Dominance hierarchies of male green swordtails  
552 (*Xiphophorus helleri*) in nature. *Journal of Fish Biology*, 43(3):497–499.
- 553 Fudenberg, D. and Levine, D. K. 1998. *The theory of learning in games*. MIT Press,  
554 Cambridge, MA.
- 555 Goymann, W. and Wingfield, J. C. 2004. Allostatic load, social status and stress  
556 hormones: the costs of social status matter. *Animal Behaviour*, 67(3):591–602.
- 557 Hamblin, S. and Giraldeau, L.-A. 2009. Finding the evolutionarily stable learning rule  
558 for frequency-dependent foraging. *Animal Behaviour*, 78(6):1343–1350.
- 559 Harley, C. B. 1981. Learning the evolutionarily stable strategy. *Journal of Theoretical*  
560 *Biology*, 89(4):611–633.
- 561 Hoffman, J. I., Boyd, I. L., and Amos, W. 2003. Male reproductive strategy and  
562 the importance of maternal status in the antarctic fur seal arctocephalus gazella.  
563 *Evolution*, 57(8):1917–1930.
- 564 Hogan, J. A. and Roper, T. J. 1978. A comparison of the properties of different  
565 reinforcers. *Advances in the Study of Behavior*, 8:155–255.
- 566 Hogg, J. T. and Forbes, S. H. 1997. Mating in bighorn sheep: frequent male reproduc-  
567 tion via a high-risk "unconventional" tactic. *Behavioral Ecology and Sociobiology*,  
568 41(1):33–48.

- 569 Johnson, R. A. 1963. Habitat preference and behavior of breeding jungle fowl in central  
570 western Thailand. *The Wilson Bulletin*, 75(3):270–272.
- 571 Johnstone, R. A. 2000. Models of reproductive skew: A review and synthesis. *Ethology*,  
572 106(1):5–26.
- 573 Kokko, H. and Johnstone, R. A. 1999. Social queuing in animal societies: a dynamic  
574 model of reproductive skew. *Proceedings of the Royal Society of London. Series B:*  
575 *Biological Sciences*, 266(1419):571–578.
- 576 Landau, H. G. 1951. On dominance relations and the structure of animal societies: I.  
577 Effect of inherent characteristics. *The Bulletin of Mathematical Biophysics*, 13(1):1–  
578 19.
- 579 Leimar, O. 2021. The evolution of social dominance through reinforcement learning.  
580 *The American Naturalist*, 197(5):560–575.
- 581 Lukas, D. and Clutton-Brock, T. 2014. Costs of mating competition limit male life-  
582 time breeding success in polygynous mammals. *Proceedings of the Royal Society B:*  
583 *Biological Sciences*, 281(1786):20140418.
- 584 McDonald, G. C., Spurgin, L. G., Fairfield, E. A., Richardson, D. S., and Pizzari,  
585 T. 2017. Pre- and postcopulatory sexual selection favor aggressive, young males in  
586 polyandrous groups of red junglefowl. *Evolution*, 71(6):1653–1669.
- 587 McNamara, J. M. and Houston, A. I. 2009. Integrating function and mechanism. *Trends*  
588 *in Ecology & Evolution*, 24:670–675.
- 589 McNamara, J. M., Houston, A. I., and Leimar, O. 2021. Learning, exploitation and  
590 bias in games. *PLOS ONE*, 16(2):e0246588.
- 591 McNamara, J. M. and Leimar, O. 2020. *Game Theory in Biology: Concepts and*  
592 *Frontiers*. Oxford University Press, Oxford (in press).
- 593 Neumann, C., Duboscq, J., Dubuc, C., Ginting, A., Irwan, A. M., Agil, M., Widdig, A.,  
594 and Engelhardt, A. 2011. Assessing dominance hierarchies: validation and advan-  
595 tages of progressive evaluation with Elo-rating. *Animal Behaviour*, 82(4):911–921.
- 596 Niv, Y., Joel, D., Meilijson, I., and Ruppin, E. 2002. Evolution of reinforcement learn-  
597 ing in uncertain environments: a simple explanation for complex foraging behaviors.  
598 *Adaptive Behavior*, 10(1):5–24.

- 599 Pemberton, J., Albon, S., Guinness, F., Clutton-Brock, T. H., and Dover, G. 1992. Be-  
600 havioral estimates of male mating success tested by DNA fingerprinting in a polyg-  
601 ynous mammal. *Behavioral Ecology*, 3(1):66–75.
- 602 Pizzari, T. and McDonald, G. C. 2019. Sexual selection in socially-structured, polyan-  
603 drous populations: Some insights from the fowl. In Naguib, M., Barrett, L., Healy,  
604 S. D., Podos, J., Simmons, L. W., and Zuk, M., editors, *Advances in the Study of*  
605 *Behavior*, volume 51, pages 77–141. Academic Press.
- 606 Port, M. and Kappeler, P. M. 2010. The utility of reproductive skew models in the  
607 study of male primates, a critical evaluation. *Evolutionary Anthropology*, 19(2):46–  
608 56.
- 609 Pörschmann, U., Trillmich, F., Mueller, B., and Wolf, J. B. W. 2010. Male reproductive  
610 success and its behavioural correlates in a polygynous mammal, the Galápagos sea  
611 lion (*Zalophus wollebaeki*). *Molecular Ecology*, 19(12):2574–2586.
- 612 Reeve, H. K., Emlen, S. T., and Keller, L. 1998. Reproductive sharing in animal  
613 societies: reproductive incentives or incomplete control by dominant breeders? *Be-*  
614 *havioral Ecology*, 9(3):267–278.
- 615 Ross, C. T., Jaeggi, A. V., Borgerhoff Mulder, M., Smith, J. E., Smith, E. A., Gavrilets,  
616 S., and Hooper, P. L. 2020. The multinomial index: a robust measure of reproductive  
617 skew. *Proceedings of the Royal Society B: Biological Sciences*, 287(1936):20202025.
- 618 Rutte, C., Taborsky, M., and Brinkhof, M. W. G. 2006. What sets the odds of winning  
619 and losing? *Trends in Ecology & Evolution*, 21(1):16–21.
- 620 Réale, D., Reader, S. M., Sol, D., McDougall, P. T., and Dingemanse, N. J. 2007.  
621 Integrating animal temperament within ecology and evolution. *Biological Reviews*,  
622 82(2):291–318.
- 623 Schjelderup-Ebbe, T. 1922. Beiträge zur Sozialpsychologie des Haushuhns. *Zeitschrift*  
624 *für Psychologie*, 88:225–252.
- 625 Sih, A., Bell, A., and Johnson, J. C. 2004. Behavioral syndromes: an ecological and  
626 evolutionary overview. *Trends in Ecology & Evolution*, 19(7):372–378.
- 627 Stopher, K. V., Nussey, D. H., Clutton-Brock, T. H., Guinness, F., Morris, A., and  
628 Pemberton, J. M. 2011. The red deer rut revisited: female excursions but no evidence  
629 females move to mate with preferred males. *Behavioral Ecology*, 22(4):808–818.



- 630 Sutton, R. S. and Barto, A. G. 2018. *Reinforcement learning: An introduction second*  
631 *edition*. MIT Press, Cambridge, MA.
- 632 Taborsky, B. and Oliveira, R. F. 2012. Social competence: an evolutionary approach.  
633 *Trends in Ecology & Evolution*, 27(12):679–688.
- 634 Tatarenkov, A., Healey, C. I. M., Grether, G. F., and Avise, J. C. 2008. Pronounced  
635 reproductive skew in a natural population of green swordtails, *Xiphophorus helleri*.  
636 *Molecular Ecology*, 17(20):4522–4534.
- 637 Twiss, S. D., Poland, V. F., Graves, J. A., and Pomeroy, P. P. 2006. Finding fathers:  
638 spatio-temporal analysis of paternity assignment in grey seals (*Halichoerus grypus*).  
639 *Molecular Ecology*, 15(7):1939–1953.
- 640 Varela, S. A. M., Teles, M. C., and Oliveira, R. F. 2020. The correlated evolution of  
641 social competence and social cognition. *Functional Ecology*, 34(2):332–343.
- 642 Wilson, A. J., de Boer, M., Arnott, G., and Grimmer, A. 2011. Integrating personality  
643 research and animal contest theory: aggressiveness in the green swordtail *Xiphopho-*  
644 *rus helleri*. *PLoS ONE*, 6(11):e28024.
- 645 Wilson, A. J., Grimmer, A., and Rosenthal, G. G. 2013. Causes and consequences of  
646 contest outcome: aggressiveness, dominance and growth in the sheephead swordtail,  
647 *Xiphophorus birchmanni*. *Behavioral Ecology and Sociobiology*, 67(7):1151–1161.
- 648 Worthington Wilmer, J., Allen, P. J., Pomeroy, P. P., Twiss, S. D., and Amos, W. 1999.  
649 Where have all the fathers gone? An extensive microsatellite analysis of paternity  
650 in the grey seal (*Halichoerus grypus*). *Molecular Ecology*, 8(9):1417–1429.
- 651 Wroblewski, E. E., Murray, C. M., Keele, B. F., Schumacher-Stankey, J. C., Hahn,  
652 B. H., and Pusey, A. E. 2009. Male dominance rank and reproductive success in  
653 chimpanzees, *Pan troglodytes schweinfurthii*. *Animal Behaviour*, 77(4):873–885.

# Figures

654

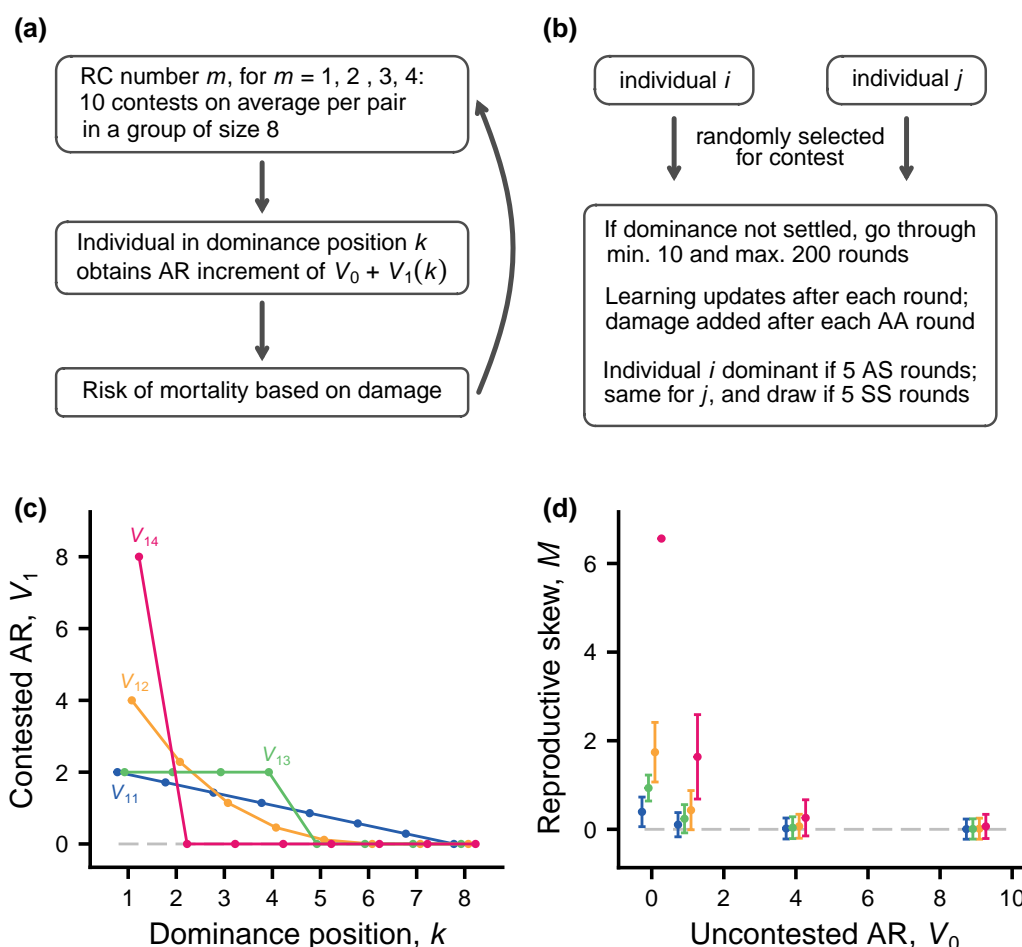

Figure 1: Elements of the model. During a mating season there are four reproductive cycles (RC) or reproductive opportunities, each starting with a sequence of contests, followed by increments in acquired resources (AR) and mortality risk, as shown in panel (a). The resource increments  $V_0$  and  $V_1(k)$  contribute to reproductive success (RS). Panel (b) summarises a contest for a randomly selected pair of group members. Panels (c) and (d) illustrate the underlying distributions of AR and RS, for a single RC. (c) Increments  $V_1(k)$ , from contested resources, as functions of the dominance position  $k$ , where  $k = 1$  is top-ranked. The curves  $V_{11}, V_{12}, V_{13}, V_{14}$  (colour coded) show the different shapes of  $V_1(k)$  used in simulations. For each curve, the mean per capita AR is 1. (d) Mean ( $\pm$  SD) of the multinomial reproductive skew index  $M$ , computed over 10 000 replicates of a group of size 8 that produces a total of 16 offspring (mean RS of 2 per group member), with AR given by  $V_0 + V_1(k)$ . The skew values are shown as functions of the uncontested AR increment  $V_0$ , for different shapes of  $V_1(k)$ , colour coded as in (c).

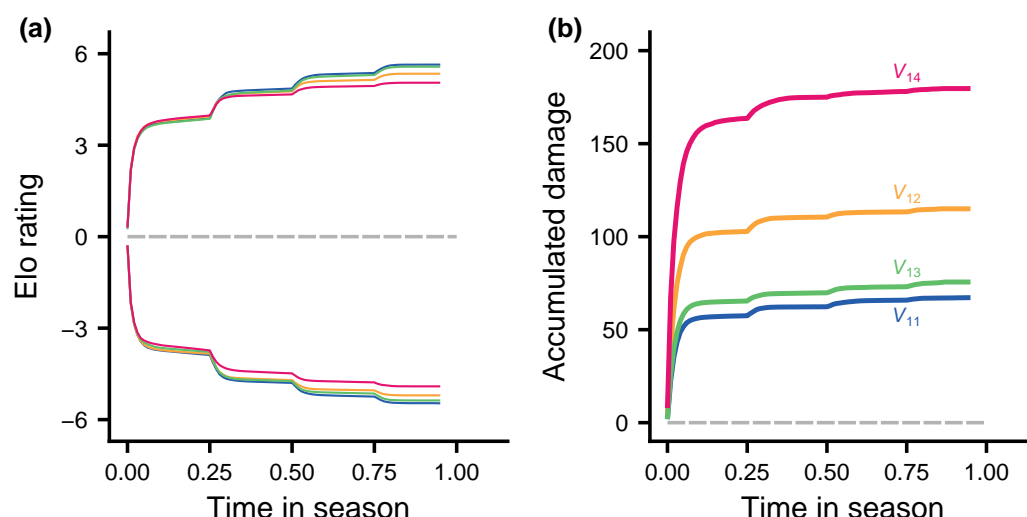

Figure 2: Average top- and bottom-ranked Elo ratings and average accumulated damage as functions of time in the season. The cases 1, 5, 9, and 13 in Table 2 (with  $V_0 = 0$ ) are shown, colour coded corresponding to the shapes of  $V_1$  in Fig. 1c. The learning parameters are given by the mean values in Table 2. For each case, 500 groups of 8 individuals were simulated and the Elo rating and accumulated damage of each individual as a function of time was computed (Fig. S1 shows examples of such curves). (a) Mean over groups of the Elo rating of the top (upper curves) and bottom (lower curves) ranked individuals in each group as functions of time in the season. (b) Mean over all groups and group members of the accumulated damage from fighting as functions of time in the season. Note that most damage accumulates in the first of the four reproductive cycles.

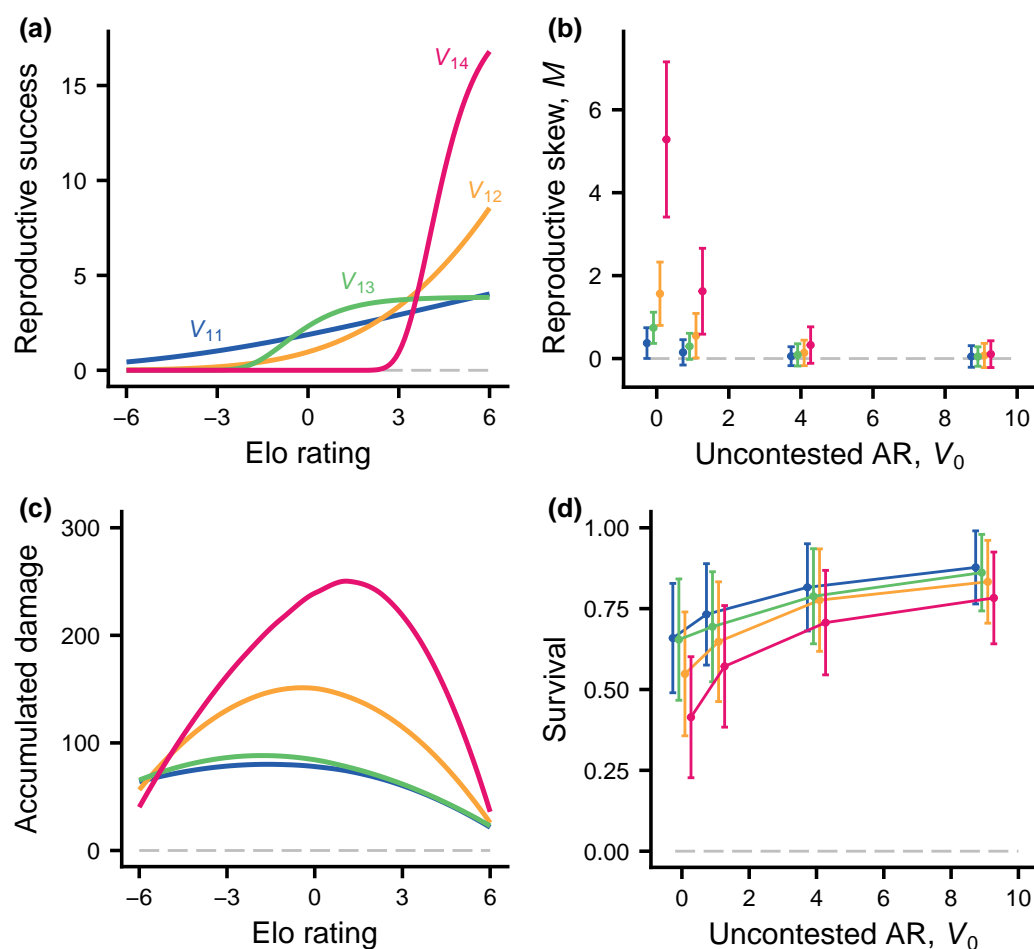

Figure 3: Distribution of RS (number of offspring; 16 per group), accumulated fighting damage, and survival, for different evolved learning parameters, with different distributions of contested and uncontested AR. Learning parameters are given by mean values in Table 2. For each case in Table 2, 500 groups of 8 were simulated. (a) Fitted number of offspring as a function of the Elo rating (which correlates with dominance position). The curves correspond to cases 1, 5, 9, and 13 in Table 2 (with  $V_0 = 0$ ) and are colour coded and labelled corresponding to the shapes of  $V_1$  in Fig. 1c. Fig. S2 shows simulated data together with fitted curves. (b) Mean ( $\pm$  SD) of the multinomial reproductive skew index  $M$ , computed from the distribution of RS in groups, for the cases in Table 2, with colour coding according the shape of  $V_1$  and the value of  $V_0$  along the x-axis (points are shifted left and right for clarity). (c) Fitted accumulated fighting damage over the season as a function of the Elo rating, for the cases in panel (a). Fig. S3 shows simulated data together with fitted curves. (d) Mean ( $\pm$  SD) survival in groups for the cases in Table 2, with colour coding according the shape of  $V_1$ .

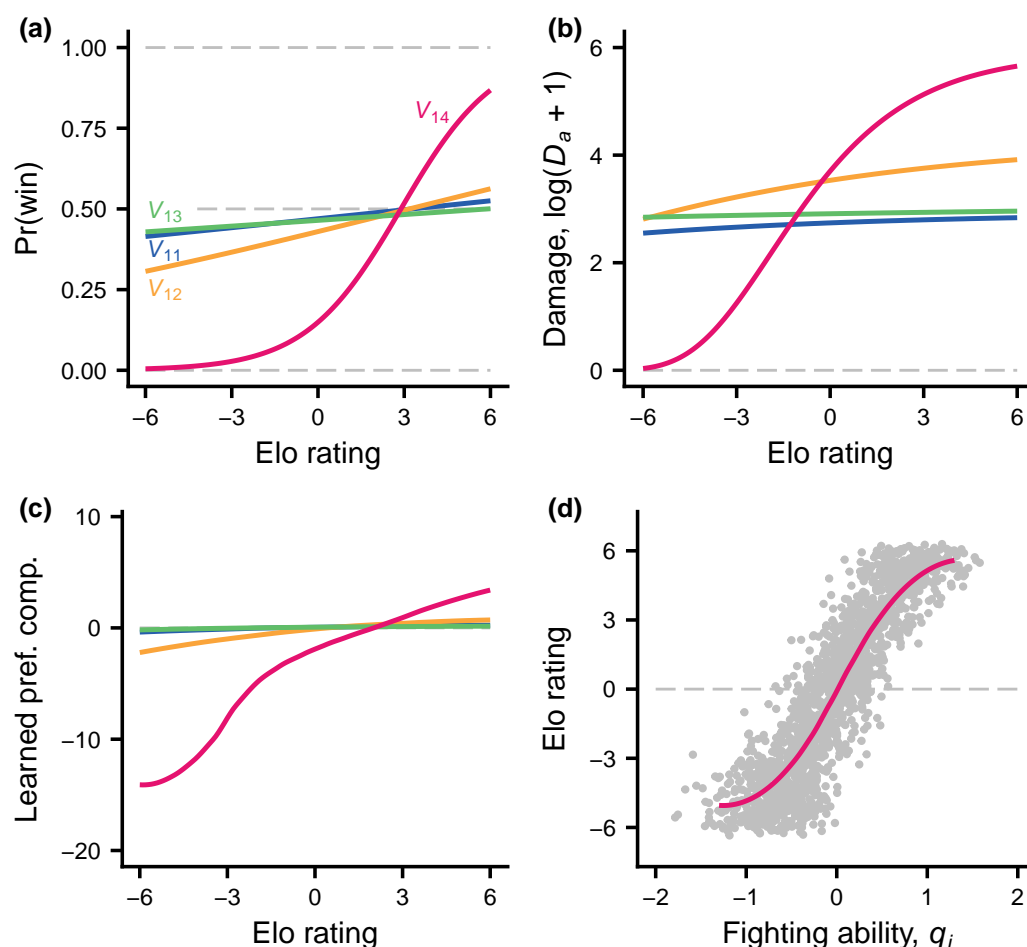

Figure 4: Illustration of hypothetical winner- and loser-effect experiments. Each group member that survived over the mating season had a staged interaction with a matched (equal fighting ability,  $q_i = q_j$ ) new and naive opponent. A staged pair had up to 10 contests as described in Fig. 1b, ending when dominance was settled. The different cases (colour coded) are those in Fig. 2a, all having  $V_0 = 0$ . For each case there were 500 simulated groups, including winner-loser experiments. (a) Fitted (logistic regression) probability of winning (becoming dominant) for a group member interacting with a matched, naive opponent, as a function of the group member's Elo rating. (b) Fitted accumulated damage (logarithmic scale) from these contests. Fig. S4 shows simulated data together with fitted curves. (c) Fitted generalised preference component ( $h_{iit}$  in Table 1) for group members at the start of staged interactions, as a function of Elo rating. Fig. S5 shows simulated data together with fitted curves. (d) Data and a loess fitted curve of the Elo rating as a function of fighting ability  $q_i$  of group members, for case 13 in Table 2 (i.e.,  $V_{14}$  in panels (a) to (c)).

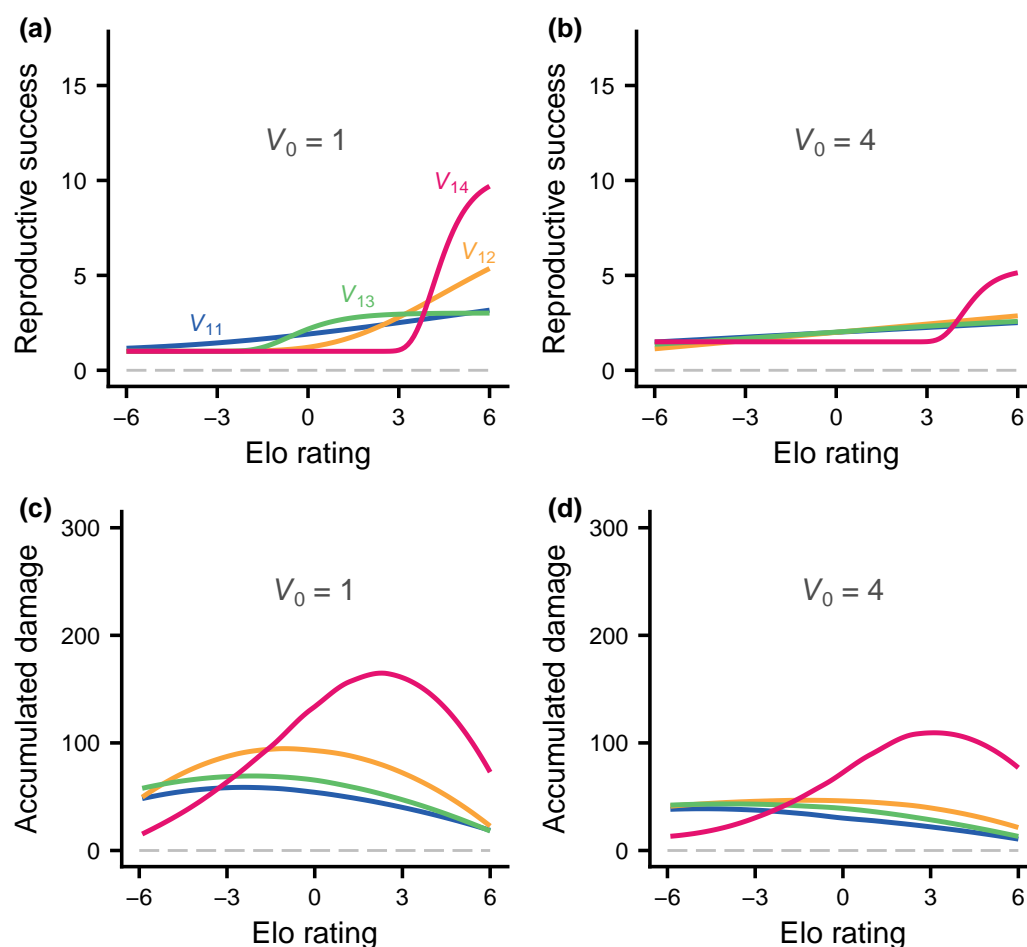

Figure 5: Fitted RS and accumulated damage over the season, as in Fig. 2a, c except that individuals also accumulate uncontested resources. Panels (a) and (c) show cases 2, 6, 10, and 14 in Table 2, with  $V_0 = 1$ , and (b) and (d) show cases 3, 7, 11, and 15, with  $V_0 = 4$ . For these values of  $V_0$ , approximately 50% and 80% of a group's total reproductive success derives from uncontested AR.



# Tables

Table 1: Definitions and notation for the model.

| notation                           | definition or explanation                                                                                                             |
|------------------------------------|---------------------------------------------------------------------------------------------------------------------------------------|
| RC                                 | reproductive cycle or opportunity; there are several reproductive opportunities during the season                                     |
| AR                                 | acquired resources; individuals accumulate contested and uncontested resources, which translate to RS                                 |
| RS                                 | reproductive success (number of offspring)                                                                                            |
| $V_0$                              | uncontested AR per individual and RC                                                                                                  |
| $V_1(k)$                           | AR per RC for individual of rank $k$ ( $k = 1$ highest)                                                                               |
| $V_{11}, V_{12}, V_{13}, V_{14}$   | different shapes of distributions $V_1(k)$                                                                                            |
| $M$                                | reproductive skew index from Ross et al. (2020)                                                                                       |
| $q_i$                              | quality (fighting ability) of individual $i$                                                                                          |
| $\mu_q, \sigma_q$                  | mean and SD of (normal) distribution of quality; $\mu_q = 0$                                                                          |
| A, S                               | available actions: A is aggressive, S is submissive                                                                                   |
| $D_{ait}$                          | accumulated fighting damage for $i$ up to time $t$ ; each AA round between $i$ and $j$ increases damage by $e^{-(q_i - q_j)}$         |
| $c_1$                              | parameter for mortality cost; survival in RC is $e^{-c_1 D_{ait}}$                                                                    |
| $h_{iit} = f_i \theta_{iit}$       | generalised component of preference for action A at time $t$                                                                          |
| $f_i, \theta_{iit}$                | degree of generalisation and learned weight for individual $i$                                                                        |
| $h_{ijt} = (1 - f_i) \theta_{ijt}$ | opponent specific component of preference for A at time $t$                                                                           |
| $\theta_{ijt}$                     | learned weight in opponent-specific component $h_{ijt}$                                                                               |
| $\theta_{0i}$                      | starting value of $\theta_{iit}$ and $\theta_{ijt}$                                                                                   |
| $\xi_{ijt}$                        | observation by $i$ , meeting $j$ at time $t$ , of relative quality                                                                    |
| $a_1, b_1, \epsilon_{ijt}$         | weights on $q_i, q_j$ , and random error in observation $\xi_{ijt}$                                                                   |
| $\sigma$                           | SD of (normally distributed) random error $\epsilon_{ijt}$                                                                            |
| $\gamma_{0i}$                      | slope parameter for $i$ in preference component $\gamma_{0i} \xi_{ijt}$                                                               |
| $p_{ijt}$                          | probability to use action A by $i$ when meeting $j$ at time $t$                                                                       |
| $l_{ijt}$                          | logit of $p_{ijt}$ , referred to as the preference for the action A, defined as $l_{ijt} = h_{iit} + h_{ijt} + \gamma_{0i} \xi_{ijt}$ |
| $\hat{v}_{ijt}$                    | estimated value (reward) by $i$ when meeting $j$ at time $t$                                                                          |
| $w_{iit}, w_{ijt}$                 | generalised and opponent-specific learned weights in $\hat{v}_{ijt}$                                                                  |
| $w_{0i}$                           | starting value of $w_{iit}$ and $w_{ijt}$                                                                                             |
| $g_{0i}$                           | slope parameter in $\hat{v}_{ijt} = f_i w_{iit} + (1 - f_i) w_{ijt} + g_{0i} \xi_{ijt}$                                               |
| $R_{ijt}$                          | perceived reward by $i$ when meeting $j$ at time $t$                                                                                  |
| $v_i$                              | perceived reward by $i$ of performing the aggressive action A                                                                         |
| $e_{ijt}, \sigma_p$                | random influence $e_{ijt}$ with SD $\sigma_p$ in penalty from AA round between $i$ and $j$ , given by $\exp(-q_i + q_j + e_{ijt})$    |
| $\alpha_{\theta_i}, \alpha_{w_i}$  | learning rates for updates by $i$ of weights in $l_{ijt}$ and $\hat{v}_{ijt}$                                                         |

Table 2: Reproductive parameters, mean survival, and trait values (mean  $\pm$  SD over 100 simulations, each over 5000 generations) for 16 different cases of individual-based evolutionary simulations of social dominance interactions.

| case | $V_0$ | $V_1$    | Surv. | $f_i$             | $\alpha_{\theta i}$ | $\alpha_{w i}$    |
|------|-------|----------|-------|-------------------|---------------------|-------------------|
| 1    | 0.0   | $V_{11}$ | 0.64  | $0.035 \pm 0.008$ | $69.7 \pm 10.1$     | $0.036 \pm 0.005$ |
| 2    | 1.0   | $V_{11}$ | 0.71  | $0.045 \pm 0.011$ | $68.1 \pm 10.3$     | $0.047 \pm 0.008$ |
| 3    | 4.0   | $V_{11}$ | 0.81  | $0.068 \pm 0.017$ | $48.5 \pm 13.1$     | $0.076 \pm 0.016$ |
| 4    | 9.0   | $V_{11}$ | 0.87  | $0.108 \pm 0.027$ | $37.5 \pm 11.5$     | $0.123 \pm 0.031$ |
| 5    | 0.0   | $V_{12}$ | 0.51  | $0.073 \pm 0.015$ | $64.6 \pm 12.5$     | $0.035 \pm 0.006$ |
| 6    | 1.0   | $V_{12}$ | 0.62  | $0.131 \pm 0.012$ | $63.8 \pm 6.5$      | $0.039 \pm 0.006$ |
| 7    | 4.0   | $V_{12}$ | 0.74  | $0.191 \pm 0.019$ | $56.4 \pm 10.1$     | $0.054 \pm 0.010$ |
| 8    | 9.0   | $V_{12}$ | 0.82  | $0.372 \pm 0.018$ | $17.8 \pm 2.1$      | $0.045 \pm 0.012$ |
| 9    | 0.0   | $V_{13}$ | 0.61  | $0.025 \pm 0.005$ | $71.5 \pm 6.1$      | $0.032 \pm 0.005$ |
| 10   | 1.0   | $V_{13}$ | 0.68  | $0.032 \pm 0.008$ | $68.4 \pm 8.4$      | $0.039 \pm 0.007$ |
| 11   | 4.0   | $V_{13}$ | 0.78  | $0.054 \pm 0.013$ | $54.4 \pm 8.0$      | $0.058 \pm 0.011$ |
| 12   | 9.0   | $V_{13}$ | 0.85  | $0.076 \pm 0.018$ | $58.1 \pm 12.6$     | $0.098 \pm 0.026$ |
| 13   | 0.0   | $V_{14}$ | 0.39  | $0.249 \pm 0.021$ | $28.9 \pm 4.4$      | $0.028 \pm 0.009$ |
| 14   | 1.0   | $V_{14}$ | 0.56  | $0.484 \pm 0.018$ | $17.0 \pm 1.5$      | $0.016 \pm 0.004$ |
| 15   | 4.0   | $V_{14}$ | 0.68  | $0.572 \pm 0.016$ | $14.8 \pm 1.1$      | $0.014 \pm 0.003$ |
| 16   | 9.0   | $V_{14}$ | 0.77  | $0.613 \pm 0.018$ | $14.4 \pm 1.2$      | $0.017 \pm 0.003$ |

table continued

| case | $\theta_{0i}$    | $w_{0i}$         | $\gamma_{0i}$   | $g_{0i}$        | $v_i$           |
|------|------------------|------------------|-----------------|-----------------|-----------------|
| 1    | $4.71 \pm 0.19$  | $-0.03 \pm 0.01$ | $1.23 \pm 0.18$ | $0.06 \pm 0.01$ | $0.86 \pm 0.01$ |
| 2    | $4.87 \pm 0.20$  | $-0.07 \pm 0.01$ | $1.84 \pm 0.23$ | $0.07 \pm 0.02$ | $0.76 \pm 0.02$ |
| 3    | $4.54 \pm 0.23$  | $-0.15 \pm 0.03$ | $2.79 \pm 0.34$ | $0.11 \pm 0.03$ | $0.56 \pm 0.04$ |
| 4    | $3.71 \pm 0.28$  | $-0.25 \pm 0.04$ | $2.96 \pm 0.35$ | $0.13 \pm 0.03$ | $0.42 \pm 0.05$ |
| 5    | $4.65 \pm 0.17$  | $-0.01 \pm 0.01$ | $0.64 \pm 0.20$ | $0.04 \pm 0.01$ | $0.95 \pm 0.01$ |
| 6    | $4.67 \pm 0.13$  | $-0.04 \pm 0.01$ | $0.95 \pm 0.18$ | $0.05 \pm 0.01$ | $0.89 \pm 0.01$ |
| 7    | $4.75 \pm 0.26$  | $-0.10 \pm 0.02$ | $1.78 \pm 0.29$ | $0.08 \pm 0.02$ | $0.76 \pm 0.02$ |
| 8    | $2.86 \pm 0.45$  | $-0.12 \pm 0.03$ | $1.66 \pm 0.37$ | $0.11 \pm 0.02$ | $0.68 \pm 0.02$ |
| 9    | $4.72 \pm 0.11$  | $-0.03 \pm 0.01$ | $0.92 \pm 0.18$ | $0.05 \pm 0.01$ | $0.89 \pm 0.01$ |
| 10   | $4.82 \pm 0.18$  | $-0.06 \pm 0.01$ | $1.57 \pm 0.22$ | $0.06 \pm 0.01$ | $0.81 \pm 0.01$ |
| 11   | $4.63 \pm 0.20$  | $-0.12 \pm 0.02$ | $2.41 \pm 0.30$ | $0.10 \pm 0.02$ | $0.64 \pm 0.03$ |
| 12   | $4.40 \pm 0.31$  | $-0.20 \pm 0.03$ | $3.27 \pm 0.52$ | $0.12 \pm 0.03$ | $0.49 \pm 0.05$ |
| 13   | $4.77 \pm 0.24$  | $0.00 \pm 0.02$  | $0.48 \pm 0.25$ | $0.05 \pm 0.02$ | $0.98 \pm 0.01$ |
| 14   | $3.17 \pm 0.24$  | $-0.05 \pm 0.02$ | $0.77 \pm 0.22$ | $0.07 \pm 0.02$ | $0.94 \pm 0.01$ |
| 15   | $0.76 \pm 0.52$  | $-0.06 \pm 0.03$ | $0.55 \pm 0.16$ | $0.08 \pm 0.02$ | $0.85 \pm 0.01$ |
| 16   | $-1.31 \pm 0.32$ | $-0.01 \pm 0.03$ | $0.73 \pm 0.17$ | $0.10 \pm 0.02$ | $0.70 \pm 0.02$ |

# Supplementary information

## Additional figures

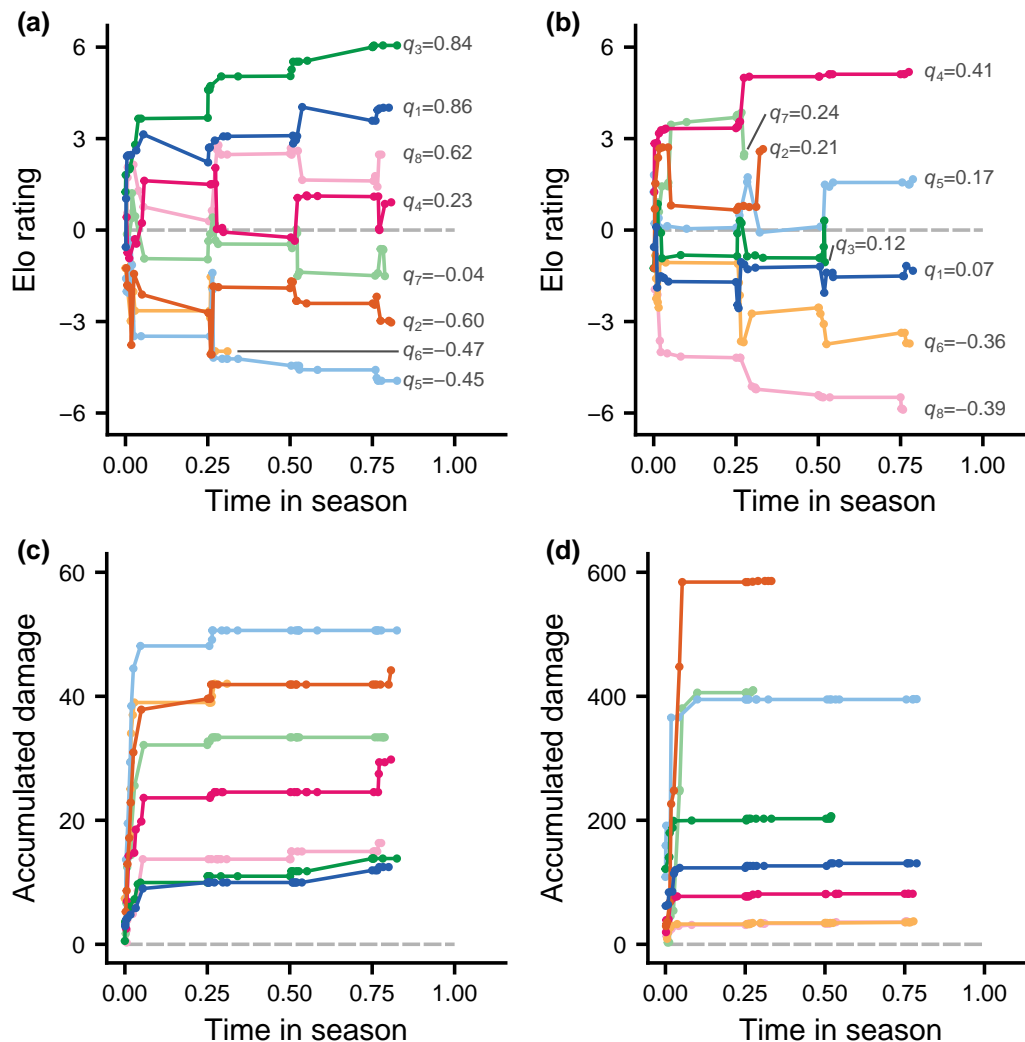

Figure S1: Panels (a) and (c) show the Elo rating and the accumulated damage over the mating season for one example of a group of 8 individuals, with AR parameters as for case 1 in Table 2 and learning traits given by the mean values for this case. The curves have different colours to allow comparison between panels (a) and (c), and are labelled in (a) with the fighting ability  $q_i$  of the individual. Panels (b) and (d) show the same for case 13 in Table 2.

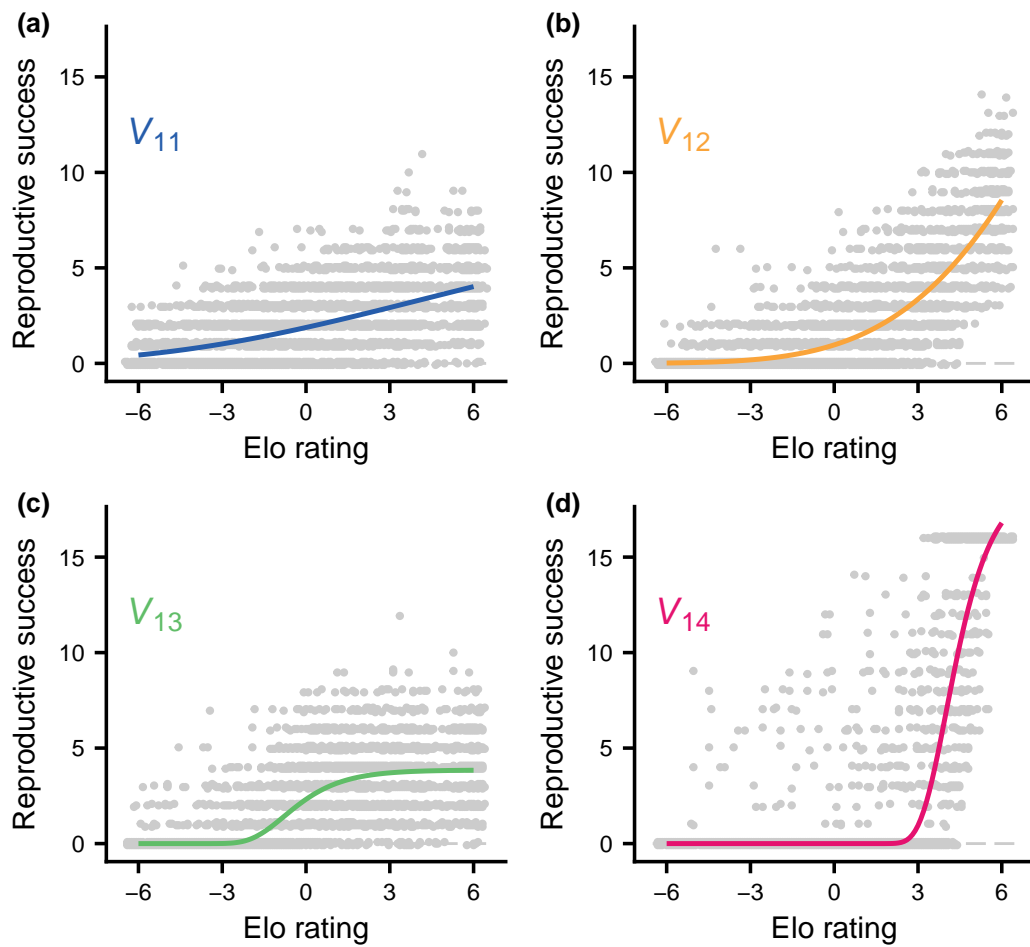

Figure S2: Simulated data and fitted curves of RS (number of offspring) for the cases in Fig. 3a (colour coded). Panels (a) to (d) show cases 1, 5, 9, and 13 in Table 2. Non-linear regression (nls function in R) was used to fit RS as a Gompertz function of the Elo rating, as described below. The locations of the grey points are shifted by small random amounts to reduce overlap.

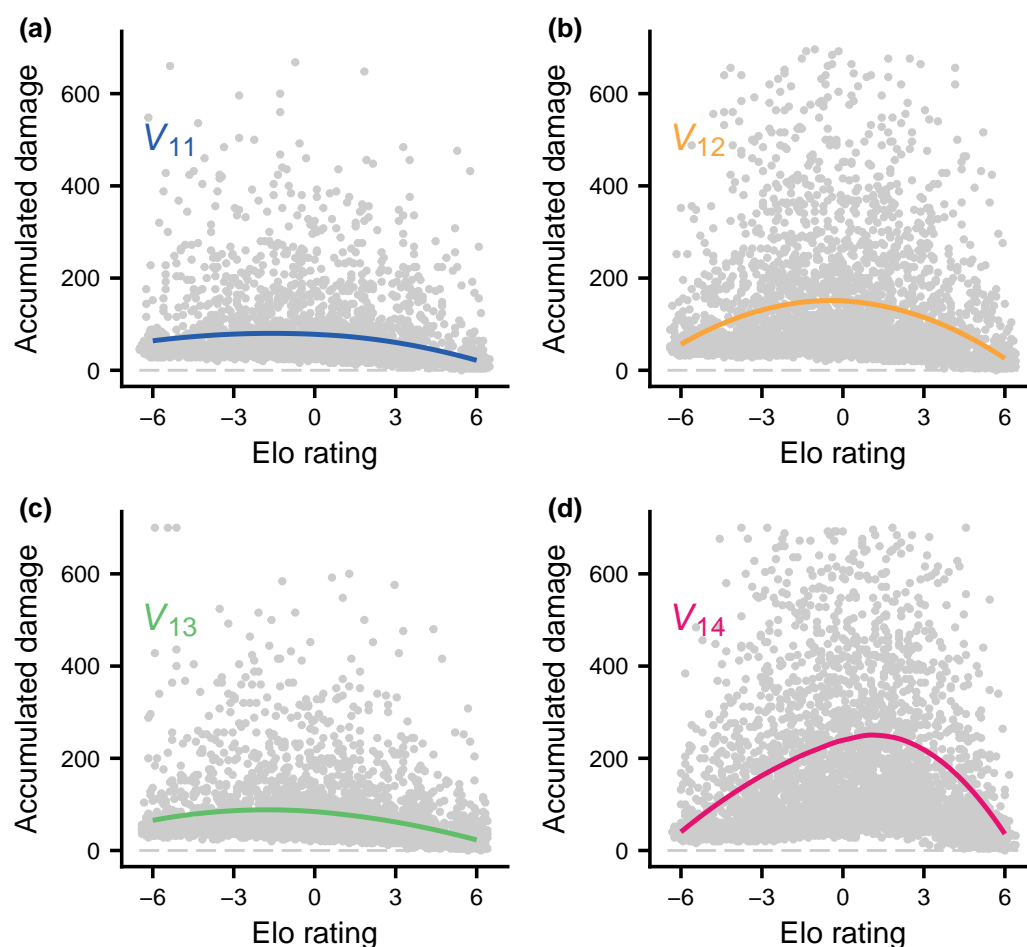

Figure S3: Simulated data and fitted curves of accumulated damage over the mating season for the cases in Fig. 3c (colour coded). Panels (a) to (d) show cases 1, 5, 9, and 13 in Table 2. Local regression (loess function in R) was used to fit accumulated damage  $D_a$  as a function of the Elo rating, as described below. The locations of the grey points are shifted by small random amounts to reduce overlap.

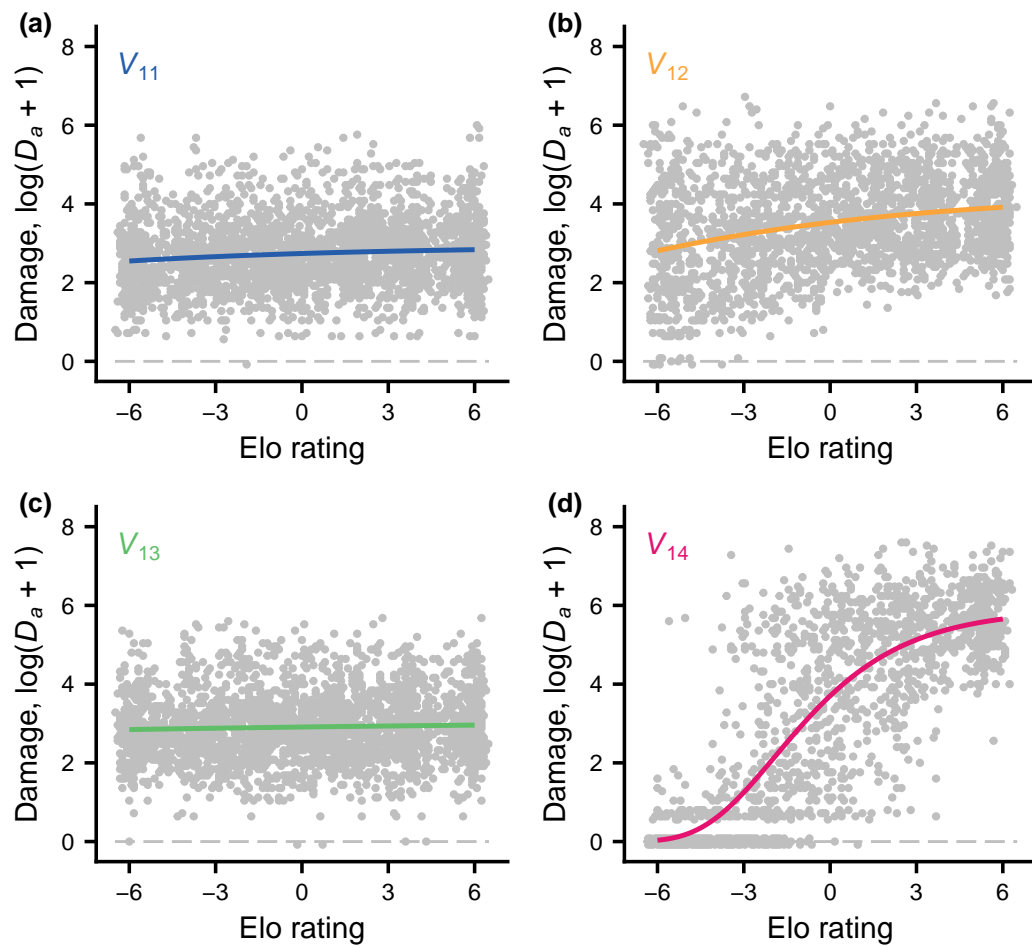

Figure S4: Simulated data and fitted curves of accumulated damage in staged winner-loser experiments against new, matched individuals for the cases in Fig. 4b (colour coded). Panels (a) to (d) show cases 1, 5, 9, and 13 in Table 2. Non-linear regression (nls function in R) was used to fit  $\log(D_a + 1)$  as a Gompertz function of the Elo rating, as described below. The locations of the grey points are shifted by small random amounts to reduce overlap.



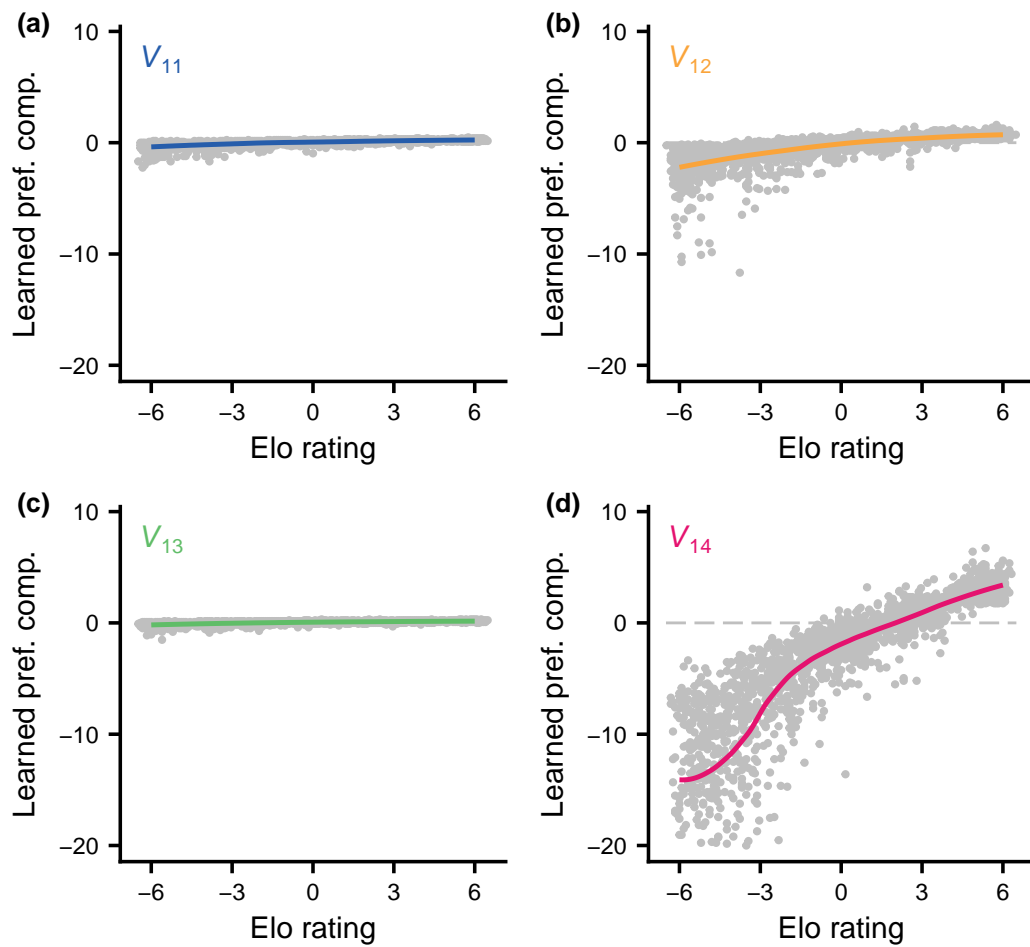

Figure S5: Simulated data and fitted curves of the generalised preference component ( $h_{iit}$  in Table 1) at the end of the mating season for the cases in Fig. 4c (colour coded). Panels (a) to (d) show cases 1, 5, 9, and 13 in Table 2. Local regression (loess function in R) was used to fit the generalised preference component as a function of a group member's Elo rating at the end the mating season. The locations of the grey points are shifted by small random amounts to reduce overlap.

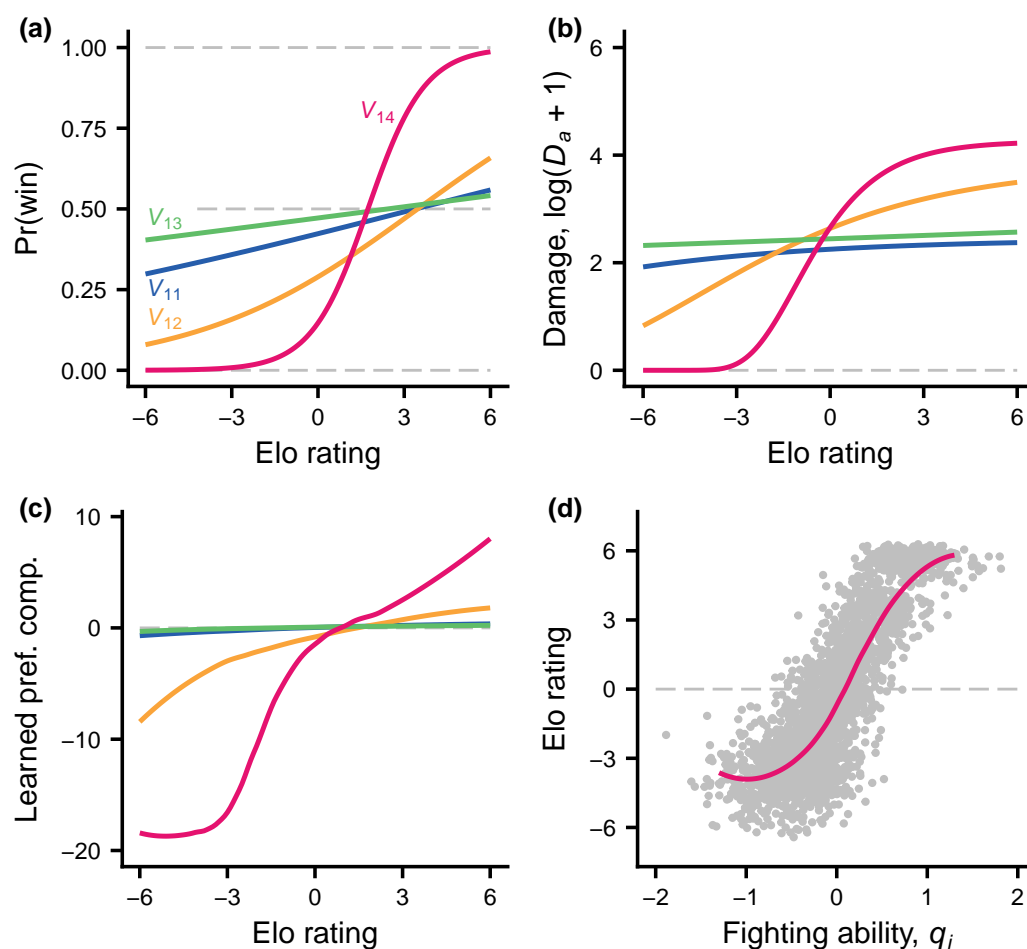

Figure S6: Illustration of hypothetical winner- and loser-effect experiments, as in Fig. 4, but with uncontested AR. Each group member that survived over the mating season had a staged interaction with a matched (equal fighting ability,  $q_i = q_j$ ) new and naive opponent. A staged pair had up to 10 contests as described in Fig. 1b, ending when dominance was settled. Cases 2, 6, 10, and 14 in Table 2 are shown (colour coded after the shape of  $V_1$ ), all of which have  $V_0 = 1$ . For each case there were 500 simulated groups, including winner-loser experiments. (a) Fitted (logistic regression) probability of winning (becoming dominant) for a group member interacting with a matched, naive opponent, as a function of the group member's Elo rating. (b) Fitted accumulated damage (logarithmic scale) from these contests. (c) Fitted generalised action preference component ( $h_{iit}$  in Table 1) for group members at the start of staged interactions, as a function of their Elo rating. (d) Data and a loess fitted curve of the Elo rating as a function of fighting ability  $q_i$  of group members, for case 14 in Table 2 (i.e.,  $V_{14}$  in panels a-c).

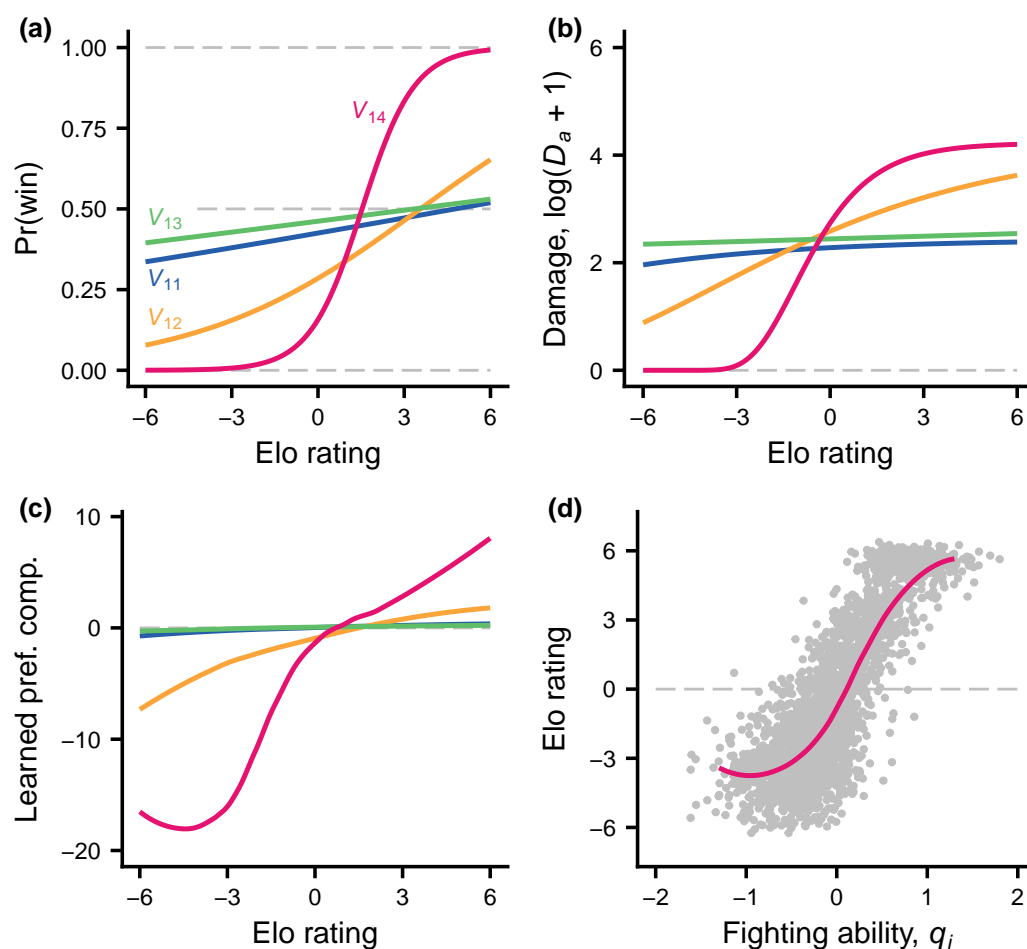

Figure S7: Illustration of hypothetical winner- and loser-effect experiments, as in Fig. 4, but with uncontested AR. Each group member that survived over the mating season had a staged interaction with a matched (equal fighting ability,  $q_i = q_j$ ) new and naive opponent. A staged pair had up to 10 contests as described in Fig. 1b, ending when dominance was settled. Cases 3, 7, 11, and 15 in Table 2 are shown (colour coded after the shape of  $V_1$ ), all of which have  $V_0 = 4$ . For each case there were 500 simulated groups, including winner-loser experiments. (a) Fitted (logistic regression) probability of winning (becoming dominant) for a group member interacting with a matched, naive opponent, as a function of the group member's Elo rating. (b) Fitted accumulated damage (logarithmic scale) from these contests. (c) Fitted generalised action preference component ( $h_{iit}$  in Table 1) for group members at the start of staged interactions, as a function of their Elo rating. (d) Data and a loess fitted curve of the Elo rating as a function of fighting ability  $q_i$  of group members, for case 15 in Table 2 (i.e.,  $V_{14}$  in panels a-c).

## 658 Statistical fitting of curves to simulated data

659 Fitted curves are shown in Figs. 2 to 5, and S2 to S7. Non-linear regressions from  
660 the R statistical package (version 4.0.5; <https://www.R-project.org/>) were used,  
661 with the aim of giving a reasonable visual summary of the individual data points from  
662 simulations. The variation around the fitted curves can be judged from Figs. S2 to S5.

663 We used either the `nls` function, (Figs. 3a, 4b, 5a, 5b, S2, S4, S6b, S7b), the `loess`  
664 function (Figs. 3c, 4c, 4d, 5c, 5d, S3, S5, S6c, S6d, S7c, S7d), or logistic regression  
665 using the `glm` function (Figs. 4a, S6a, S7a). For the `nls` fits of RS to Elo rating  $E_i$   
666 we used either a Gompertz function,  $A \exp(-B \exp(-CE_i))$ , or a modified Gompertz  
667 function  $A \exp(-B \exp(-CE_i)) + D$ , as the non-linear function, with  $A, B, C, D$  as  
668 parameters to be fitted.

## 669 Model details

670 Several parts of the model are the same as in a previous one (Leimar 2021). These are  
671 the observations in a round, the actions A and S, the action preferences and estimated  
672 values, the implementation of action exploration, and the learning updates. They are  
673 described previously (Leimar 2021) but, for completeness, they are also given here.  
674 Aspects of the current model that are different from the previous one are outlined in  
675 the main text, including in Table 1, and at the end of this section we give additional  
676 details.

## 677 Observations and actions

678 The model simplifies a round of interaction into two stages. In the first stage, inter-  
679 acting individuals make an observation. Thus, individuals observe some aspect  $\xi$  of  
680 relative fighting ability and also observe the opponent's identity. The observation by  
681 an individual is statistically related to the difference in fighting ability between itself  
682 and the opponent,  $q_i - q_j$ . For the interaction between individuals  $i$  and  $j$  at time  $t$ ,  
683 the observation is

$$\xi_{ijt} = a_1 q_i - b_1 q_j + \epsilon_{ijt}, \quad (\text{S1})$$

684 where  $a_1, b_1 \geq 0$  and  $\epsilon_{ijt}$  is an error of observation, assumed to be normal with mean  
685 zero and SD  $\sigma$  ( $a_1 = b_1$  is assumed in all simulations). By adjusting the parameters  $\sigma, q$ ,  
686 which is the SD of the distribution of  $q_i$ , and  $a_1, b_1$ , and  $\sigma$  from equation (S1), one can  
687 make the information about relative quality more or less accurate. The observation  
688  $(\xi_{ij}, j)$  is followed by a second stage, where individual  $i$  chooses an action, and similarly

for individual  $j$ . The model simplifies to only two actions, A and S, corresponding to aggressive and submissive behaviour.

## Action preferences and estimated values

For an individual  $i$  interacting with  $j$  at time  $t$ ,  $l_{ijt}$  denotes the preference for A. The probability that  $i$  uses A is then

$$p_{ijt} = \frac{1}{1 + \exp(-l_{ijt})}, \quad (\text{S2})$$

so that the preference  $l_{ijt}$  is the logit of the probability of using A. The model uses a linear (intercept and slope) representation of the effect of  $\xi_{ijt}$  on the preference, and expresses  $l_{ijt}$  as the sum of three components

$$l_{ijt} = h_{iit} + h_{ijt} + \gamma_{0i}\xi_{ijt} = f_i\theta_{iit} + (1 - f_i)\theta_{ijt} + \gamma_{0i}\xi_{ijt}. \quad (\text{S3})$$

Here  $h_{iit} = f_i\theta_{iit}$  is a contribution from generalisation of learning from all interactions,  $h_{ijt} = (1 - f_i)\theta_{ijt}$  is a contribution specifically from learning from interactions with a particular opponent  $j$ , and  $\gamma_{0i}\xi_{ijt}$  is a contribution from the current observation of relative fighting ability. Note that for  $f_i = 0$  the learning about each opponent is a separate thing, with no generalisation between opponents, and for  $f_i = 1$  the intercept component of the action preference is the same for all opponents, so that effectively there is no individual recognition (although the observations  $\xi_{ijt}$  could still differ between opponents). One can similarly write the estimated value  $\hat{v}_{ijt}$  of an interaction as a sum of three components:

$$\hat{v}_{ijt} = f_i w_{iit} + (1 - f_i)w_{ijt} + g_{0i}\xi_{ijt}. \quad (\text{S4})$$

The actor-critic method updates  $\theta_{iit}$ ,  $\theta_{ijt}$ ,  $w_{iit}$ , and  $w_{ijt}$  in these expressions based on perceived rewards, whereas  $f_i$ ,  $\gamma_{0i}$ , and  $g_{0i}$  are genetically determined.

## Exploration in learning

For learning to be efficient over longer time spans there must be exploration (variation in actions), in order to discover beneficial actions. Learning algorithms, including the actor-critic method, might not provide sufficient exploration, because learning tends to respond to short-term rewards. In the model, exploration is implemented as follows: if the probability in equation (S2) is less than 0.01 or greater than 0.99, the actual choice probability is assumed to stay within these limits, i.e. is 0.01 or 0.99, respectively. In

principle the degree of exploration could be genetically determined and evolve to an optimum value, but for simplicity this is not implemented in the model.

## Perceived rewards

An SS interaction is assumed to have zero rewards,  $R_{ijt} = R_{jit} = 0$ . For an AS interaction, the aggressive individual  $i$  perceives a reward  $R_{ijt} = v_i$ , which is genetically determined and can evolve. The perceived reward for the submissive individual  $j$  is zero,  $R_{jit} = 0$ , and vice versa for SA interactions. If both individuals use A, some form of costly dominance display or fight occurs, with perceived costs (negative rewards or penalties) that are influenced by the fighting abilities of the two individuals. The perceived rewards of an AA interaction are assumed to be

$$\begin{aligned} R_{ijt} &= v_i - \exp(-q_i + q_j + e_{ijt}) \\ R_{jit} &= v_j - \exp(-q_j + q_i + e_{jit}), \end{aligned} \quad (S5)$$

where  $e_{ijt}$  is a normally distributed random influence on the perceived penalty, with mean zero and standard deviation  $\sigma_p$ , and similarly for  $e_{jit}$ .

## Learning updates

In actor-critic learning, an individual updates its learning parameters based on the prediction error (TD error)

$$\delta_{ijt} = R_{ijt} - \hat{v}_{ijt}, \quad (S6)$$

which is the difference between the actual perceived reward  $R_{ijt}$  and the estimated value  $\hat{v}_{ijt}$ . The learning updates for the  $\theta$  parameters are given by

$$\begin{aligned} \theta_{ii,t+1} &= \theta_{iit} + \alpha_{\theta i} f_i \zeta_{ijt} \delta_{ijt} \\ \theta_{ij,t+1} &= \theta_{ijt} + \alpha_{\theta i} (1 - f_i) \zeta_{ijt} \delta_{ijt}, \end{aligned} \quad (S7)$$

where

$$\zeta_{ijt} = \begin{cases} 1 - p_{ijt} & \text{if A was chosen} \\ -p_{ijt} & \text{if S was chosen} \end{cases} \quad (S8)$$

is referred to as a policy-gradient factor and  $\alpha_{\theta i}$  is the preference learning rate for individual  $i$ . Note that  $\zeta_{ijt}$  will be small if  $p_{ijt}$  is close to one and individual  $i$  performed

735 action A, which slows down learning, with a corresponding slowing down if  $p_{ijt}$  is close  
736 to zero and S is chosen. There are also learning updates for the  $w$  parameters given by

$$\begin{aligned} w_{ii,t+1} &= w_{iit} + \alpha_{wi} f_i \delta_{ijt} \\ w_{ij,t+1} &= w_{ijt} + \alpha_{wi} (1 - f_i) \delta_{ijt}, \end{aligned} \quad (S9)$$

737 where  $\alpha_{wi}$  is the value learning rate for individual  $i$ .

738 The updates to the policy parameters  $\theta$  can be described using derivatives of the  
739 logarithm of the probability of choosing an action with respect to the parameters.  
740 Using equation (S2), we obtain

$$\zeta_{ijt} = \begin{cases} \frac{d \log \Pr(A)}{d l_{ijt}} = 1 - p_{ijt} & \text{if A was chosen} \\ \frac{d \log \Pr(S)}{d l_{ijt}} = -p_{ijt} & \text{if S was chosen} \end{cases} \quad (S10)$$

741 for the derivative of the logarithm of the probability of choosing an action, A or S, with  
742 respect to the preference for A, which corresponds to equation (S8). From equation  
743 (S3) it follows that

$$\begin{aligned} \frac{\partial l_{ijt}}{\partial \theta_{iit}} &= f_i \\ \frac{\partial l_{ijt}}{\partial \theta_{ijt}} &= 1 - f_i \end{aligned} \quad (S11)$$

744 and this gives the learning updates of the  $\theta$  parameters in equation (S7). The updates  
745 of the  $w$  parameters of the value function can also be described using derivatives. From  
746 equation (S4) it follows that

$$\begin{aligned} \frac{\partial \hat{v}_{ijt}}{\partial w_{iit}} &= f_i \\ \frac{\partial \hat{v}_{ijt}}{\partial w_{ijt}} &= 1 - f_i \end{aligned} \quad (S12)$$

747 and this gives the learning updates of the  $w$  parameters in equation (S9).

## 748 Life-history and reproductive season

749 There is an annual life cycle with a single reproductive season. Dominance interactions  
750 occur in groups of size  $g_s$ , with  $g_s = 8$  for the individual-based simulations in Table  
751 2. The season is split into a number of reproductive cycles; there are 4 cycles for  
752 the simulations in Table 2. A cycle starts with a sequence of contests. Each contest is



between a randomly selected pair of group members and there are  $5g_s(g_s - 1)$  contests in a cycle, i.e., on average 10 contests per pair. As a result of the contests, a dominance hierarchy is formed, and group members acquire resources according to their ranks. Survival from one cycle to the next depends on the damage accumulated in contests. The purpose of the scheme is to implement a combination of hierarchy formation, resource acquisition, and mortality over the season in a way that allows both fitness benefits and costs to influence trait evolution. In principle very similar results could be achieved by, for instance, implementing a risk of mortality after each contest, or even after each round of interaction.

## Contests

If a dominance relation has already been established between contestants  $i$  and  $j$  in the current cycle, there is no interaction. If not, the contestants go through a number of rounds, at minimum 10 rounds and at maximum 200 rounds of interaction. If there are 5 successive rounds where  $i$  uses A and  $j$  uses S (5 AS rounds), the contest ends and  $i$  is considered dominant over  $j$ , and vice versa if there are 5 successive SA rounds. Further, the contest ends in a draw if there are 5 successive SS rounds. In the following cycle (if there is one), previously dominance relations are reset, so the hierarchy needs to be reformed, but group members retain their learning. The reason for this is to induce a kind of exploration of the dominance relations. Previously undecided relations can then become decided, and the possible consequences of group members dropping out (dying) between one cycle and the next can have an influence.

## Acquired resources

After the contests in the current cycle, group members acquire resources. Each (surviving) individual obtains an increment  $V_0$ , irrespective of dominance relations. If a linear hierarchy has been established, an individual with rank  $k$  (with  $k = 1$  the top rank) obtains a resource increment of  $V_1(k)$ . The ranking is based on how many other group members an individual dominates (this measure is referred to as a score structure by Landau (1951)). If some individuals dominate the same number of other group members, their relative rank is randomly determined. So, for instance, if all individuals would use action S in the contests, there would be no real dominance hierarchy (each would dominate 0 other group members), and it is random which of them obtains  $V_1(1)$ ,  $V_1(2)$ , etc.

## 785 Accumulated fighting damage and mortality

786 A group member  $i$  accumulates damage  $D_{ait}$  from fighting. In an AA round between  $i$   
787 and  $j$ , the increment to  $D_{ait}$  is

$$\exp(-(q_i - q_j)), \quad (\text{S13})$$

788 and similarly for  $j$ . An individual with accumulated damage  $D_{ait}$  survives from one  
789 cycle to the next with probability

$$\exp(-c_1 D_{ait}). \quad (\text{S14})$$

## 790 Reproductive success

791 A local group, containing 8 interacting individuals and 8 of the other sex, produces  
792 16 offspring. For each offspring, one parent of each sex is randomly drawn from the  
793 group, with a probability proportional to acquired resources for interacting individuals.  
794 In the next generation, each offspring disperses to a random local group. In this way,  
795 interacting individuals are unrelated.

## 796 Elo rating

797 Several approaches to Elo ratings have been used, differing in such things as the zero  
798 point of the scale and the amount to change ratings after a ‘win’ by one individual over  
799 another, or after a ‘draw’. There is similarity between updates of Elo ratings and the  
800 updates of action preferences for actor-critic learning described above. Here, however,  
801 we use the Elo rating just as a conventional measure or index of dominance rank,  
802 without further interpretation of what the scores might mean. The possible usefulness  
803 of this measure needs instead to be investigated. From our results here, Elo ratings  
804 appear useful in providing a simplified description of a dominance hierarchy.

805 Let  $E_{it}$  be the Elo rating of group member  $i$  at time  $t$ . Initially all have rating  
806  $E_{i0} = 0$ . If a contest between  $i$  and  $j$  ends with  $i$  becoming dominant over  $j$ ,  $E_{it}$  is  
807 incremented by

$$2.5(1 - P_{ijt}), \quad (\text{S15})$$

808 where

$$P_{ijt} = \frac{1}{1 + \exp(-E_{it} + E_{jt})}. \quad (\text{S16})$$

809 The Elo rating of  $j$ ,  $E_{jt}$ , is decremented by the same amount. If the contest ends in a  
810 draw,  $E_{it}$  is decremented by

$$2.5(P_{ijt} - 0.5), \quad (\text{S17})$$

811 and  $E_{jt}$  is incremented by this amount. It can help the interpretation to think of  $P_{ijt}$   
812 as the probability, before the interaction, of the outcome ('win', 'loss', or 'draw'). This,  
813 however, is just an interpretation that helps explaining why Elo ratings are defined in  
814 a certain way. For dominance relations, which are qualitatively different from wins  
815 and losses in a tournament, it is not certain that Elo ratings are useful for predicting  
816 outcomes of dominance interactions. One can, of course, investigate the usefulness for  
817 each particular case.
